# Supplementary material for: Venovenous extracorporeal membrane oxygenation in patients with acute covid-19 associated respiratory failure: comparative effectiveness study
Source: PubMed Central journal article supplement — BMJ. 2022 May 4;377:e068723. doi: 10.1136/bmj-2021-068723 (PMC9065544; doi:10.1136/bmj-2021-068723), 2022-05-04
Supplement: urnm068723.ww.pdf [file urnm068723.ww.pdf]

# **Venovenous Extracorporeal Membrane Oxygenation in Patients with Acute Respiratory Failure from COVID-19: A Comparative Effectiveness Study**

Martin Uner, doctoral fellow,<sup>1,2,3</sup> Adrian G Barnett, professor,<sup>4</sup> Gianluigi Li Bassi, associate professor,<sup>5,6,7,8,9</sup> Daniel Brodie, professor,<sup>10,11</sup> Heidi J Dalton, associate professor,<sup>12,13</sup> Niall D Ferguson, professor,<sup>1,2,3,14,15,16</sup> Silver Heinsar, doctoral fellow,<sup>5,6,8,17</sup> Carol L Hodgson, professor,<sup>18,19</sup> Giles Peek, professor,<sup>20</sup> Kiran Shekar, associate professor,<sup>5,6,9</sup> Jacky Y Suen, postdoctoral researcher,<sup>5,6</sup> John F Fraser, professor,<sup>5,6,8</sup> Eddy Fan(<https://orcid.org/0000-0002-1210-9914>), associate professor<sup>1,2,3, 14,16</sup>; on behalf of the COVID-19 Critical Care Consortium Investigators

1. Interdepartmental Division of Critical Care Medicine, University of Toronto, Toronto, ON, Canada
2. Department of Medicine, University of Toronto, Toronto, ON, Canada
3. Institute of Health Policy, Management and Evaluation, University of Toronto, Toronto, ON, Canada
4. Australian Centre for Health Services Innovation and Centre for Healthcare Transformation, School of Public Health and Social Work, Queensland University of Technology, Brisbane, QLD, Australia
5. Critical Care Research Group, Adult Intensive Care Services, Prince Charles Hospital, Brisbane, QLD, Australia
6. Faculty of Medicine, University of Queensland, Brisbane, QLD, Australia
7. Institut d'Investigacions Biomèdiques August Pi i Sunyer, Barcelona, Spain
8. Intensive Care Unit, St Andrew's War Memorial Hospital and The Wesley Hospital, Uniting Care Hospitals, Brisbane, QLD, Australia
9. Institute of Health and Biomedical Innovation, Queensland University of Technology, Brisbane, Queensland, Australia
10. Department of Medicine, Columbia College of Physicians and Surgeons, New York, NY, USA
11. Center for Acute Respiratory Failure, New York-Presbyterian Hospital, New York, NY, USA
12. Pediatric Critical Care Medicine, Inova Fairfax Hospital, Falls Church, VA, USA
13. Heart and Vascular Institute, Inova Fairfax Hospital, Falls Church, VA, USA
14. Toronto General Hospital Research Institute, Toronto, ON, Canada
15. Department of Physiology, University of Toronto, Toronto, ON, Canada
16. Division of Respirology, Department of Medicine, University Health Network, Toronto, ON, Canada
17. Department of Intensive Care, North Estonia Medical Centre, Tallinn, Estonia
18. Australian and New Zealand Intensive Care Research Centre, Monash University, Melbourne, VIC, Australia
19. Department of Intensive Care, Alfred Health, Melbourne, VIC, Australia
20. Congenital Heart Center, University of Florida, Gainesville, FL, USA

## **Supplementary Appendix**

### Corresponding Author

Eddy Fan, MD, PhD  
Toronto General Hospital,  
585 University Avenue, 9 MaRS-9013  
Toronto, Ontario, Canada, M5G 2N2  
Tel: (416) 340-5483  
Email: [eddy.fan@uhn.ca](mailto:eddy.fan@uhn.ca)

## Supplementary Appendix

This supplement has additional information on methods and results, organized as:

|                                                                                        |    |
|----------------------------------------------------------------------------------------|----|
| 1. Summary of the analysis protocol and details on methods (Table S1, Figures S1)..... | 3  |
| 2. Description of the cohort (Figure S2, Tables S2 to S7).....                         | 7  |
| 3. Additional results (Tables S9 to S14).....                                          | 17 |
| 4. Sensitivity analyses (Figures S3 to S5) .....                                       | 25 |
| 5. Missing data (Figure S6 and S7, Table S15).....                                     | 29 |
| 6. Contributors and collaborators (Table S17 and S18).....                             | 33 |

## 1. Summary of the analysis protocol and details on methods (Table S1, Figures S1)

Please, refer to the figures and tables within the next pages.

- **Table S1.** Summary of the protocol of a target trial estimating differences in outcomes of patients treated with extracorporeal membrane oxygenation (ECMO), if the ratio of arterial pressure of oxygen / fraction of inspiratory oxygen ( $\text{PaO}_2/\text{FiO}_2$ ) was less than 80 mmHg, compared to treatment with conventional mechanical ventilation without the use of ECMO.
- **Figure S1.** Illustration of the three-step analytical procedure to obtain adherence-adjusted estimates.

### Additional details on statistical analyses: calculation of inverse probability weights

Our models to compute the inverse probability weights included the following covariates in a flexible functional form: age, sex, Sequential Organ Failure Assessment (SOFA) and Acute Physiologic Assessment and Chronic Health Evaluation (APACHE) II score, inability to walk, stage III kidney failure (defined as either urine output < 0.3 ml/kg body weight per hour for  $\geq 24$  hours, serum creatinine  $\geq 4.0$  mg/dl (353.6  $\mu\text{mol/l}$ ), or renal replacement therapy), presence of chronic neurological, cardiac, pulmonary, or liver disease, malignant neoplasms, treatment with vasoactive drugs, renal replacement therapy, neuromuscular blockade, prone position, inhaled nitric oxide, and ventilation parameters, such as airway plateau pressure, positive end-expiratory pressure (PEEP), fraction of inspired oxygen ( $\text{FiO}_2$ ), ratio of partial pressure of arterial oxygen-to-fraction of inspired oxygen ( $\text{PaO}_2/\text{FiO}_2$  ratio), arterial pH, duration of mechanical ventilation, and time. The inverse probability weight for each day was calculated as 1 divided by the cumulative probability of not being artificially censored. This means that patients with a high probability of not being censored (relatively unlikely to be put on ECMO) are down-weighted in the analysis, whilst those with a low probability of not being censored (relatively likely to be put on ECMO) are up-weighted.

### **Additional details on statistical analyses: missing data**

We imputed missing measurements at baseline with the ‘mice’ package using fully conditionally specified models, including failure time and outcome<sup>1</sup>. For longitudinal missing values, we carried the last observation forward, similar to previous work<sup>2</sup>. Carrying forward the last available value reflects what the treatment team would do in clinical practice at the bedside. Details on missing data patterns and sensitivity analyses to detect potential influence of missing data or multiple imputation are provided in a separate section of the supplementary appendix.

### **Additional details on statistical analyses: secondary analyses**

We analyzed if age and comorbidities associated with more severe COVID-19, such as diabetes mellitus, obesity, or arterial hypertension, were effect modifiers.<sup>3,4</sup> Based on previous work, we examined the following age groups: < 50 years, ≥ 50 and < 65 years, and ≥ 65 years.<sup>5,6</sup> To investigate whether the duration of mechanical ventilation preceding ECMO initiation (PaO<sub>2</sub>/FiO<sub>2</sub> ratio < 80 mmHg<sup>7</sup>) modified the effectiveness of ECMO, we emulated different hypothetical scenarios where ECMO could only be initiated if the patient had received invasive mechanical ventilation for a specific number of days preceding cannulation.

### **Additional details on statistical analyses: sensitivity analyses**

We performed a number of sensitivity analyses. First, we replicated the primary analysis with a control outcome instead of hospital mortality to detect the potential presence of uncontrolled confounding. A random variable drawn from a Bernoulli distribution with a 50:50 probability was used as control outcome variable, safely assuming the intervention does not have a causal effect on a random outcome variable. Also, we repeated the primary analyses using an alternative set of covariates for the construction of the inverse probability weights to detect a potential influence of model misspecification, missing data, or multiple imputation. Second, we repeated the primary analysis, excluding patients from the United States (which contributed the largest number of ECMO patients to the cohort), to investigate whether our estimates are robust for a potential country-specific heterogeneity in treatment. Also, we performed a sensitivity analysis in which we used inverse probability weighting to adjust for potential country-specific heterogeneity. Third, we estimated the effects for the primary analysis in patients with complete measurements and without variable imputation.

**Table S1.** Summary of the protocol of a target trial estimating differences in outcomes of patients treated with extracorporeal membrane oxygenation (ECMO), if the ratio of arterial pressure of oxygen / fraction of inspiratory oxygen ( $\text{PaO}_2/\text{FiO}_2$ ) was less than 80mmHg, compared to treatment with conventional mechanical ventilation without the use of ECMO.

| <b>Component</b>            | <b>Hypothetical randomized trial</b>                                                                                                                                                                                                                                                                 | <b>Emulation</b>                                                                                                                                                                    |
|-----------------------------|------------------------------------------------------------------------------------------------------------------------------------------------------------------------------------------------------------------------------------------------------------------------------------------------------|-------------------------------------------------------------------------------------------------------------------------------------------------------------------------------------|
| <b>Eligibility</b>          | Patients of all ages with clinically suspected (determined by attending physician) or laboratory-confirmed SARS-CoV-2 infection (real-time PCR and/or next-generation sequencing) were eligible if they were admitted to an ICU between January 3, 2020, and January 26, 2021.                       | Same as hypothetical trial                                                                                                                                                          |
| <b>Treatment strategies</b> | <ol style="list-style-type: none"> <li>1. Treatment with ECMO therapy if <math>\text{PaO}_2/\text{FiO}_2 &lt; 80\text{mmHg}</math></li> <li>2. Treatment with conventional mechanical ventilation without the use of ECMO therapy</li> </ol>                                                         | Same as hypothetical trial                                                                                                                                                          |
| <b>Treatment assignment</b> | Patients are randomly assigned to one of the strategies. Stratification was performed based on baseline severity of illness (i.e., $\text{PaO}_2/\text{FiO}_2$ ratio).                                                                                                                               | We assumed that patients were randomly assigned within levels of the following baseline variables: age, sex, APACHE III and SOFA score, as well as severity of respiratory failure. |
| <b>Blinding</b>             | The treatment team was aware of the assigned treatment strategy.                                                                                                                                                                                                                                     | Same as hypothetical trial                                                                                                                                                          |
| <b>Follow-up</b>            | <p>The follow-up started at the time of assignment to a ventilation strategy and ended at one of:</p> <ul style="list-style-type: none"> <li>• Death</li> <li>• Discharge home alive (competing event)</li> <li>• 60 days after enrollment (censoring event)</li> </ul> <p>whichever comes first</p> | Same as hypothetical trial                                                                                                                                                          |
| <b>Primary outcome</b>      | Hospital mortality                                                                                                                                                                                                                                                                                   | Same as hypothetical trial                                                                                                                                                          |
| <b>Causal contrast</b>      | Per protocol effect                                                                                                                                                                                                                                                                                  | Observational analogue of the per protocol effect                                                                                                                                   |
| <b>Statistical analysis</b> | In the per-protocol analysis, patients were censored when they deviated from their assigned strategy. The per-protocol effect was estimated after adjustment for baseline variables and for time-varying variables associated with adherence to the assigned treatment strategy.                     | Same as hypothetical trial, except that we created two clones per eligible patient and assigned one to each treatment strategy. <sup>a</sup>                                        |

<sup>a</sup> Adapted from M. Hernán and J. Robins on how to emulate a target trial using observational data.<sup>8</sup>

**Figure S1.** The figure illustrates a three-step analytical procedure to obtain adherence-adjusted estimates. Cloning, censoring, and weighting represents a robust analysis approach that eliminates immortal time bias in the estimates of absolute and relative risk.<sup>9</sup> First, we created clones of each patient and assigned these clones to the different treatment strategies: ECMO therapy, where patients were treated with extracorporeal membrane oxygenation (ECMO) if the PaO<sub>2</sub>/FiO<sub>2</sub> was < 80 mmHg, and conventional mechanical ventilation without ECMO (illustrated below as ‘mechanical ventilation’). Second, we censored clones that were non-adherent to their assigned treatment strategy during follow-up (e.g., initiation of extracorporeal membrane oxygenation in the group treated with conventional mechanical ventilation; see example for patient #2). For each day, we calculated the probability of not being censored (illustrated as grey “p” for each day of follow-up), based on factors that might have been considered by the treatment team to decide whether extracorporeal membrane oxygenation therapy should be initiated or not. Third, absolute risks, differences in absolute risks, and risk ratios (RR) were calculated with weighted marginal structural models. The weights were calculated from 1 divided by the cumulative probability of not being censored, illustrated as grey ‘IPW’ (inverse probability weight) in the illustration. A more comprehensive description of this analysis approach is available elsewhere.<sup>9-11</sup>

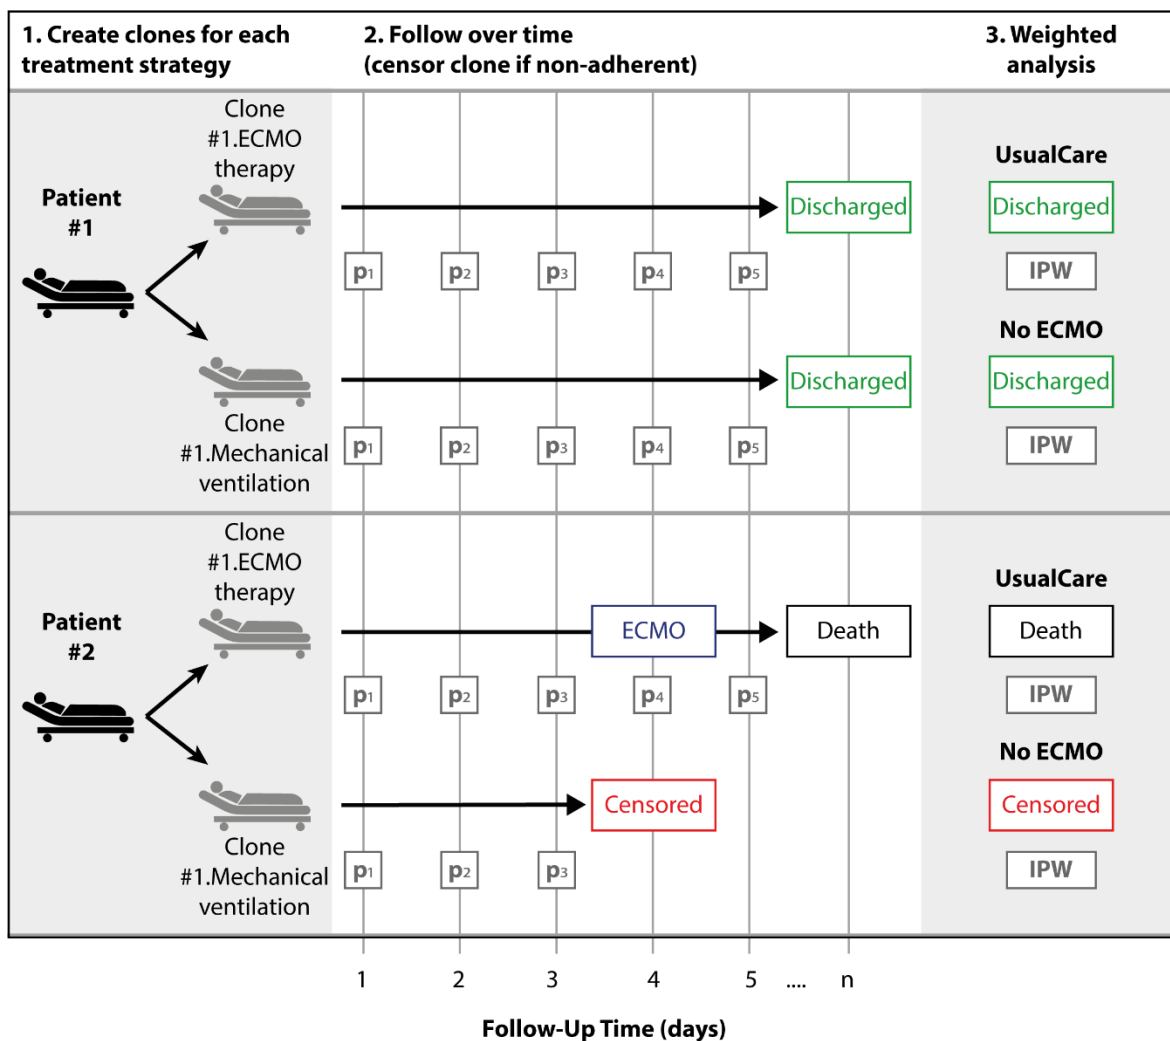

**Additional details:**

Randomly assigning patients to only one treatment strategy is statistically inefficient. Therefore, cloning was used to assign patients to multiple strategies.

Patients were artificially censored, if they deviated from their assigned treatment strategy. While the cloning procedure has prevented immortal time bias, artificial censoring introduced selection bias in the analysis.

Inverse probability weighting was used to address the selection bias due to artificial censoring.

## 2. Description of the cohort (Figure S2, Tables S2 to S7)

Please, refer to the figures and tables within the next pages.

- **Figure S2.** Study profile.
- **Table S2.** Comorbidities.
- **Table S3.** Specific therapies.
- **Table S4.** Complications.
- **Table S5.** Participating countries.
- **Table S6.** Ethnicity.
- **Table S7.** Characteristics of patients treated with Extracorporeal Membrane oxygenation (ECMO) before and after cannulation under observation of clinical practice.

### **Additional details:**

In the following, we describe the study profile and give characteristics of the study cohort.

### **Audits of the COVID-19 Critical Care Consortium database:**

The database quality audits of the COVID-19 Critical Care Consortium dataset are a continuing and intensive process encompassing: 1) data cleaning rules, 2) checks for outliers, 3) filtering rules setup during the initial development of the case report form, which was periodically monitored/adjusted, 3) data completeness checks. Finally, in the case any issue was detected during monitoring of data quality, or statistical analysis, these matters were followed up to address any data collection/process limitation in a timely manner. Importantly, the audit process often included follow-up with the site that entered the data for value verification and correction where possible.

### **Data protection:**

Each collaborating site obtained approval from their Institutional Review Boards (IRBs) and executed a data sharing agreement (DSA), before recording any data into the REDCap case report form. Of note, in case IRB indicated that a DSA were not required, based on local regulations, we requested an official email and/or signed document to clearly state the reason for not requiring a DSA. Importantly, we used a REDCap case report form. REDCap is compliant with GDPR requirements and has mechanisms to process GDPR requests. The study fully

complied to valid requests under GDPR on demand, as part of the standard administration of the database.

Finally, raw data of the COVID-19 Critical Care Consortium is only accessible to the Consortium data management core team in Brisbane, AU. The investigators wrote and tested the R code for the analysis a priori based on a simulated dataset (without real patient data) and subsequently submitted the code for execution to the Consortium data management core team in Brisbane, AU. The team provided to the Consortium core statistical team the aggregated R markdown output which was then used to write the manuscript. Individual patient data were at no time point accessible or transferred to the computers of the investigators.



**Figure S2.** Study profile. ECMO = Extracorporeal Membrane oxygenation.

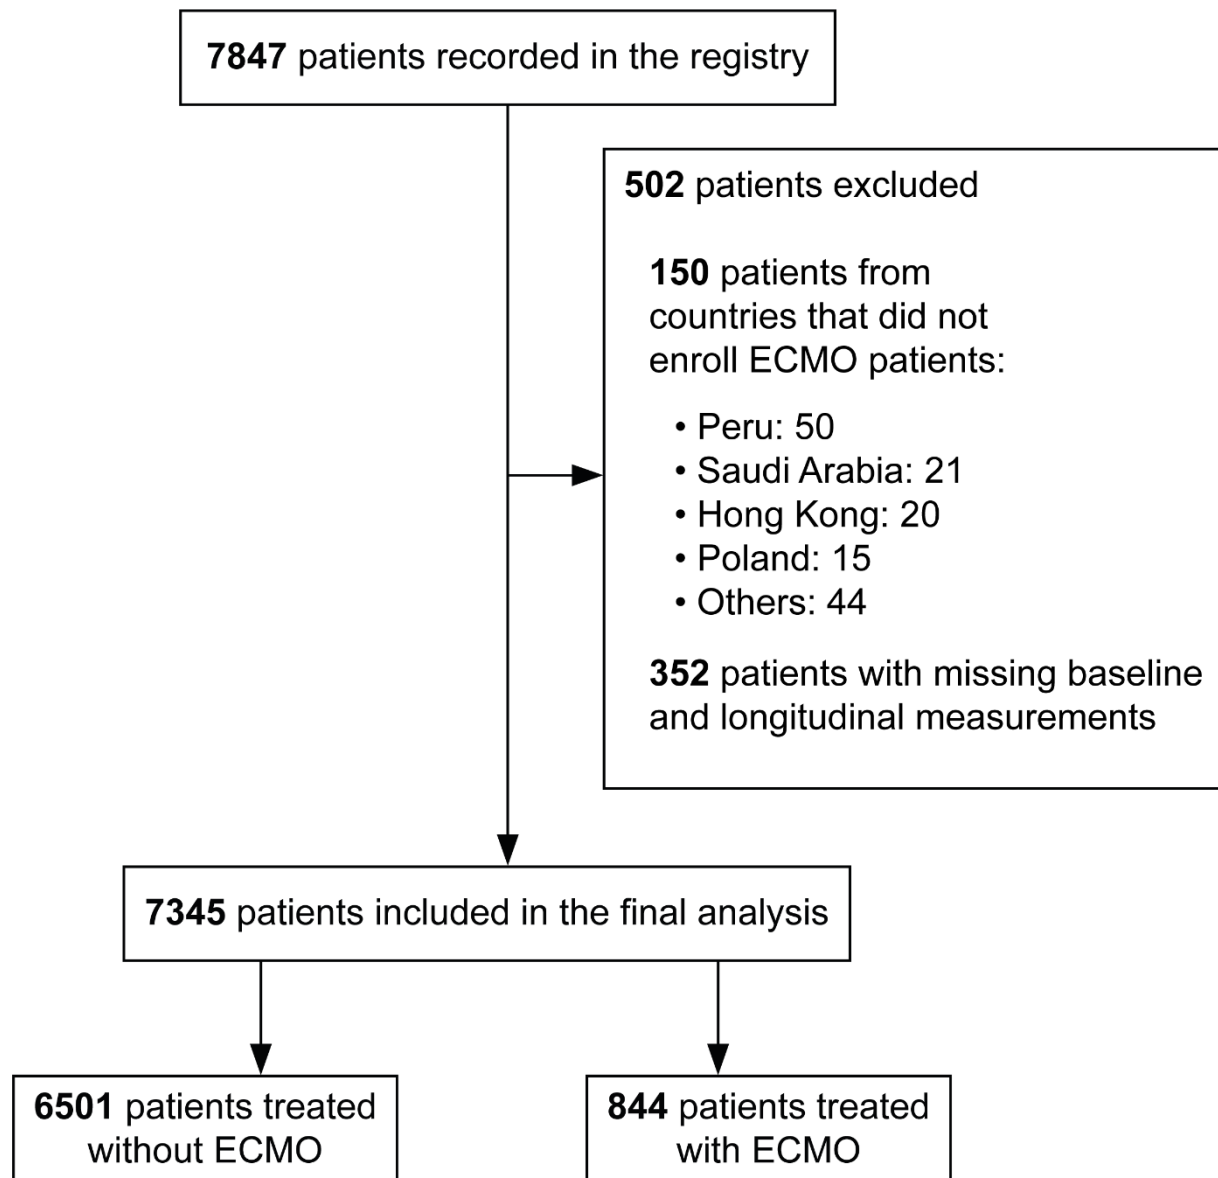

**Table S2.** Comorbidities, numbers and percentages by treatment under observed clinical practice.

|                                     | <b>Overall</b> | <b>Treatment<br/>without ECMO</b> | <b>Treatment with<br/>ECMO</b> |
|-------------------------------------|----------------|-----------------------------------|--------------------------------|
| N                                   | 7,345          | 6,501                             | 844                            |
| Chronic cardiac disease (%)         | 1,080 (15)     | 1,035 (16)                        | 45 (5.3)                       |
| Arterial hypertension (%)           | 4,203 (57)     | 3,853 (59)                        | 350 (41)                       |
| Obesity (%)                         | 1,603 (22)     | 1,290 (20)                        | 313 (37)                       |
| Chronic pulmonary disease (%)       | 602 (8.2)      | 561 (8.6)                         | 41 (4.9)                       |
| Asthma (%)                          | 386 (5.3)      | 308 (4.7)                         | 78 (9.2)                       |
| Chronic kidney disease (%)          | 547 (7.4)      | 507 (7.8)                         | 40 (4.7)                       |
| Genito-urinary comorbidities (%)    | 339 (4.6)      | 310 (4.8)                         | 29 (3.4)                       |
| Gastro-pancreatic comorbidities (%) | 313 (4.3)      | 266 (4.1)                         | 47 (5.6)                       |
| Mild liver disease (%)              | 95 (1.3)       | 82 (1.3)                          | 13 (1.5)                       |
| Severe liver disease (%)            | 234 (3.2)      | 211 (3.2)                         | 23 (2.7)                       |
| Chronic neurological disorder (%)   | 279 (3.8)      | 256 (3.9)                         | 23 (2.7)                       |
| Dementia (%)                        | 145 (2.0)      | 145 (2.2)                         | 0 (0)                          |
| Malignant neoplasm (%)              | 199 (2.7)      | 185 (2.8)                         | 14 (1.7)                       |
| Rheumatologic disorder (%)          | 208 (2.8)      | 181 (2.8)                         | 27 (3.2)                       |
| Endocrinological comorbidities (%)  | 1,353 (18)     | 1,217 (19)                        | 136 (16)                       |
| Diabetes (%)                        | 1,887 (26)     | 1,707 (26)                        | 180 (21)                       |
| Diabetes type I (%)                 | 53 (0.7)       | 46 (0.7)                          | 7 (0.8)                        |
| Hematologic disease (%)             | 222 (3.0)      | 194 (3.0)                         | 28 (3.3)                       |
| Asplenia (%)                        | 15 (0.2)       | 11 (0.2)                          | 4 (0.5)                        |
| Immunocompromised state (%)         | 48 (0.7)       | 40 (0.6)                          | 8 (0.9)                        |
| HIV (%)                             | 54 (0.7)       | 50 (0.8)                          | 4 (0.5)                        |
| Tuberculosis (%)                    | 42 (0.6)       | 38 (0.6)                          | 4 (0.5)                        |
| Malnutrition (%)                    | 100 (1.4)      | 90 (1.4)                          | 10 (1.2)                       |
| Chronic alcohol abuse (%)           | 126 (1.7)      | 106 (1.6)                         | 20 (2.4)                       |
| IV drug use (%)                     | 23 (0.3)       | 21 (0.3)                          | 2 (0.2)                        |
| Smoking (%)                         | 2,521 (34)     | 2,136 (33)                        | 385 (46)                       |

**Abbreviations:** ECMO = Extracorporeal Membrane oxygenation. HIV = Human Immunodeficiency Virus. IV = Intravenous.

**Table S3.** Specific therapies, numbers and percentages by treatment under observed clinical practice.

|                                                                    | <b>Overall</b> | <b>Treatment without<br/>ECMO</b> | <b>Treatment with<br/>ECMO</b> |
|--------------------------------------------------------------------|----------------|-----------------------------------|--------------------------------|
| N                                                                  | 7,345          | 6,501                             | 844                            |
| Number of patients receiving transfusions during follow-up         |                |                                   |                                |
| Packed red blood cells (%)                                         | 97 (1.3)       | 29 (0.4)                          | 68 (8.1)                       |
| Platelets (%)                                                      | 12 (0.2)       | 7 (0.1)                           | 5 (0.6)                        |
| Plasma (%)                                                         | 25 (0.3)       | 12 (0.2)                          | 13 (1.5)                       |
| Cryoprecipitates (%)                                               | 7 (<0.1)       | 6 (<0.1)                          | 1 (0.1)                        |
| Anticoagulation therapy during follow-up                           |                |                                   |                                |
| Continuous infusion of unfractionated heparin, n (%)               | 966 (13)       | 471 (7.2)                         | 495 (59)                       |
| Low molecular weight heparin, n (%)                                | 2,646 (36)     | 2,447 (38)                        | 199 (24)                       |
| Subcutaneous unfractionated heparin, n (%)                         | 820 (11)       | 719 (11)                          | 101 (12)                       |
| Argatroban, n (%)                                                  | 57 (0.8)       | 18 (0.3)                          | 39 (4.6)                       |
| Hirulog and bivalirudin, n (%)                                     | 46 (0.6)       | 8 (0.1)                           | 38 (4.5)                       |
| Danaparoid Lepirudin, n (%)                                        | 6 (<0.1)       | 3 (<0.1)                          | 3 (0.4)                        |
| Desirudin, n (%)                                                   | 1 (<0.1)       | 0 (0)                             | 1 (0.1)                        |
| Nafamostat Mesilate, n (%)                                         | 15 (0.2)       | 8 (0.1)                           | 7 (0.8)                        |
| Other, n (%)                                                       | 175 (2.4)      | 146 (2.2)                         | 29 (3.4)                       |
| Treatment with corticosteroids during follow-up, no (%)            | 2,961 (40)     | 2,528 (39)                        | 433 (51)                       |
| Number of patients receiving anti-infective drugs during follow-up |                |                                   |                                |
| Antibiotics (%)                                                    | 4,429 (60)     | 3,804 (59)                        | 625 (74)                       |
| Antifungal agents (%)                                              | 825 (11)       | 588 (9.0)                         | 237 (28)                       |
| Antiviral agents (%)                                               | 2,136 (29)     | 1,792 (28)                        | 344 (41)                       |
| Remdesivir (%)                                                     | 736 (10)       | 598 (9.2)                         | 138 (16)                       |

**Abbreviations:** ECMO = Extracorporeal Membrane oxygenation.

The number of patients who received treatment with steroids is low, considering the results of the RECOVERY trial which have been published in February 2021. While the registry data does not allow us to identify the reason for the low rate of steroid treatment, multiple reasons might account for this finding, including the recruitment of patients before the results of the RECOVERY trial were available, as well as potential enrollment of patients who had already completed their treatment course with steroids.

**Table S4.** Complications, numbers and percentages by treatment under observed clinical practice.

| <b>Complication at any time point during follow-up</b> | <b>Overall</b> | <b>Treatment without ECMO</b> | <b>Treatment with ECMO</b> |
|--------------------------------------------------------|----------------|-------------------------------|----------------------------|
| N                                                      | 7,345          | 6,501                         | 844                        |
| Acute renal failure (%)                                | 1,489 (20)     | 1,171 (18)                    | 318 (38)                   |
| Anemia (%)                                             | 1,423 (19)     | 1,064 (16)                    | 359 (43)                   |
| Bacteremia (%)                                         | 764 (10)       | 530 (8.2)                     | 234 (28)                   |
| Bacterial pneumonia (%)                                | 1,182 (16)     | 894 (14)                      | 288 (34)                   |
| Bronchiolitis (%)                                      | 37 (0.5)       | 31 (0.5)                      | 6 (0.7)                    |
| Cardiac arrest (%)                                     | 694 (9.4)      | 580 (8.9)                     | 114 (14)                   |
| Cardiac arrhythmia (%)                                 | 737 (10)       | 577 (8.9)                     | 160 (19)                   |
| Cardiac ischemia (%)                                   | 196 (2.7)      | 164 (2.5)                     | 32 (3.8)                   |
| Cardiomyopathy (%)                                     | 86 (1.2)       | 69 (1.1)                      | 17 (2.0)                   |
| Endocarditis (%)                                       | 15 (0.2)       | 11 (0.2)                      | 4 (0.5)                    |
| Heart failure (%)                                      | 287 (3.9)      | 259 (4.0)                     | 28 (3.3)                   |
| Hyperglycemia (%)                                      | 1,447 (20)     | 1,193 (18)                    | 254 (30)                   |
| Liver dysfunction (%)                                  | 628 (8.6)      | 487 (7.5)                     | 141 (17)                   |
| Meningitis (%)                                         | 35 (0.5)       | 33 (0.5)                      | 2 (0.2)                    |
| Myocardial infarction (%)                              | 98 (1.3)       | 87 (1.3)                      | 11 (1.3)                   |
| Myocarditis/pericarditis (%)                           | 85 (1.2)       | 66 (1.0)                      | 19 (2.3)                   |
| Pneumothorax (%)                                       | 290 (3.9)      | 158 (2.4)                     | 132 (16)                   |
| Pleural effusion (%)                                   | 586 (8.0)      | 408 (6.3)                     | 178 (21)                   |
| Pancreatitis (%)                                       | 32 (0.4)       | 21 (0.3)                      | 11 (1.3)                   |
| Pulmonary embolism (%)                                 | 187 (2.5)      | 150 (2.3)                     | 37 (4.4)                   |
| Rhabdomyolysis (%)                                     | 88 (1.2)       | 67 (1.0)                      | 21 (2.5)                   |
| Seizure (%)                                            | 77 (1.0)       | 61 (0.9)                      | 16 (1.9)                   |
| Stroke (%)                                             | 137 (1.9)      | 90 (1.4)                      | 47 (5.6)                   |
| Coagulation disorder (%)                               | 643 (8.8)      | 467 (7.2)                     | 176 (21)                   |
| Complications related to haemorrhage / bleeding:       |                |                               |                            |
| Death from haemorrhagic shock                          | 22 (1.1)       | 11 (0.7)                      | 11 (2.9)                   |
| Gastrointestinal haemorrhage (%)                       | 236 (3.2)      | 174 (2.7)                     | 62 (7.3)                   |
| Stroke with subarachnoid haemorrhage, n (%)            | 26 (0.4)       | 10 (0.2)                      | 16 (2.1)                   |
| Stroke with intraparenchymal haemorrhage, n (%)        | 42 (0.7)       | 18 (0.3)                      | 24 (3.2)                   |
| Haemorrhage, other/not-specified, n (%)                | 445 (6.1)      | 290 (4.5)                     | 155 (18)                   |

**Abbreviations:** ECMO = Extracorporeal Membrane oxygenation.

**Table S5.** Participating countries, numbers and percentages by treatment under observed clinical practice.

|               | <b>Overall</b> | <b>Treatment without<br/>ECMO</b> | <b>Treatment with<br/>ECMO</b> |
|---------------|----------------|-----------------------------------|--------------------------------|
| N             | 7,345          | 6,501                             | 844                            |
| Italy         | 2,390 (33)     | 2,241 (34)                        | 149 (18)                       |
| United States | 1,305 (18)     | 1,006 (15)                        | 299 (35)                       |
| Indonesia     | 838 (11)       | 827 (13)                          | 11 (1.3)                       |
| Australia     | 398 (5.4)      | 379 (5.8)                         | 19 (2.3)                       |
| Colombia      | 305 (4.2)      | 222 (3.4)                         | 83 (9.8)                       |
| Spain         | 269 (3.7)      | 249 (3.8)                         | 20 (2.4)                       |
| South Africa  | 205 (2.8)      | 202 (3.1)                         | 3 (0.4)                        |
| Canada        | 202 (2.8)      | 183 (2.8)                         | 19 (2.3)                       |
| Kuwait        | 192 (2.6)      | 136 (2.1)                         | 56 (6.6)                       |
| Ireland       | 178 (2.4)      | 172 (2.6)                         | 6 (0.7)                        |
| Qatar         | 155 (2.1)      | 153 (2.4)                         | 2 (0.2)                        |
| Chile         | 138 (1.9)      | 129 (2.0)                         | 9 (1.1)                        |
| Estonia       | 131 (1.8)      | 122 (1.9)                         | 9 (1.1)                        |
| Japan         | 125 (1.7)      | 105 (1.6)                         | 20 (2.4)                       |
| Germany       | 103 (1.4)      | 69 (1.1)                          | 34 (4.0)                       |
| Belgium       | 93 (1.3)       | 75 (1.2)                          | 18 (2.1)                       |
| Argentina     | 86 (1.2)       | 84 (1.3)                          | 2 (0.2)                        |
| Brazil        | 86 (1.2)       | 69 (1.1)                          | 17 (2.0)                       |
| Austria       | 46 (0.6)       | 28 (0.4)                          | 18 (2.1)                       |
| South Korea   | 44 (0.6)       | 31 (0.5)                          | 13 (1.5)                       |
| Portugal      | 16 (0.2)       | 0 (0)                             | 16 (1.9)                       |
| China         | 12 (0.2)       | 10 (0.2)                          | 2 (0.2)                        |
| Thailand      | 9 (0.1)        | 8 (0.1)                           | 1 (0.1)                        |
| Netherlands   | 7 (<0.1)       | 1 (<0.1)                          | 6 (0.7)                        |
| India         | 4 (<0.1)       | 0 (0)                             | 4 (0.5)                        |
| Mexico        | 4 (<0.1)       | 0 (0)                             | 4 (0.5)                        |
| Singapore     | 1 (<0.1)       | 0 (0)                             | 1 (0.1)                        |
| Taiwan        | 1 (<0.1)       | 0 (0)                             | 1 (0.1)                        |
| Uruguay       | 1 (<0.1)       | 0 (0)                             | 1 (0.1)                        |
| Vietnam       | 1 (<0.1)       | 0 (0)                             | 1 (0.1)                        |

**Abbreviations:** ECMO = Extracorporeal Membrane oxygenation.

**Table S6.** Ethnicity, numbers and percentages by treatment under observed clinical practice.

|                | <b>Overall</b> | <b>Treatment without<br/>ECMO</b> | <b>Treatment with<br/>ECMO</b> |
|----------------|----------------|-----------------------------------|--------------------------------|
| N              | 7,345          | 6,501                             | 844                            |
| Aboriginal     | 40 (0.8)       | 31 (0.7)                          | 9 (1.1)                        |
| Arab           | 286 (5.5)      | 232 (5.2)                         | 54 (6.8)                       |
| Black          | 485 (9.3)      | 407 (9.2)                         | 78 (9.8)                       |
| East Asian     | 255 (4.9)      | 207 (4.7)                         | 48 (6.0)                       |
| Latin American | 753 (14)       | 568 (13)                          | 185 (23)                       |
| South Asian    | 714 (14)       | 681 (15)                          | 33 (4.1)                       |
| West Asian     | 30 (0.6)       | 23 (0.5)                          | 7 (0.9)                        |
| White          | 1,732 (33)     | 1,450 (33)                        | 282 (35)                       |
| Other          | 524 (10)       | 461 (10)                          | 63 (7.9)                       |
| Not available  | 411 (7.9)      | 374 (8.4)                         | 37 (4.6)                       |

**Abbreviations:** ECMO = Extracorporeal Membrane oxygenation.

**Table S7.** Characteristics of patients treated with Extracorporeal Membrane oxygenation (ECMO) before and after cannulation under observation of clinical practice.

|                                                | <b>Measurements on the day before cannulation</b> | <b>Measurements on the day of cannulation</b> | <b>Measurements on the day after cannulation</b> |
|------------------------------------------------|---------------------------------------------------|-----------------------------------------------|--------------------------------------------------|
| Tidal volume, mL/kg PBW                        | 6.2 (5.5 – 7.0)                                   | 6.0 (5.2 – 6.8)                               | 5.7 (4.1 – 6.6)                                  |
| Missing, no. (%)                               | 542 (64.2)                                        | 470 (55.7)                                    | 549 (65)                                         |
| Respiratory rate, min <sup>-1</sup>            | 24 (18 – 30)                                      | 22 (14 – 30)                                  | 16 (10 – 25)                                     |
| Missing, no. (%)                               | 247 (29.3)                                        | 90 (10.7)                                     | 403 (47.7)                                       |
| Airway plateau pressure, cmH <sub>2</sub> O    | 24 (22 – 27)                                      | 24 (22 – 27)                                  | 24 (22 – 27)                                     |
| Missing, no. (%)                               | 640 (75.8)                                        | 590 (69.9)                                    | 627 (74.3)                                       |
| PEEP, cmH <sub>2</sub> O                       | 11 (10 – 14)                                      | 11 (10 – 14)                                  | 11 (10 – 14)                                     |
| Missing, no. (%)                               | 462 (54.7)                                        | 352 (41.7)                                    | 504 (59.7)                                       |
| FiO <sub>2</sub> , %                           | 75 (60 – 100)                                     | 80 (60 – 100)                                 | 69 (50 – 97)                                     |
| Missing, no. (%)                               | 356 (42.2)                                        | 237 (28.1)                                    | 454 (53.8)                                       |
| PaO <sub>2</sub> , mmHg                        | 70 (59 – 88)                                      | 70 (58 – 88)                                  | 71 (60 – 88)                                     |
| Missing, no. (%)                               | 259 (30.7)                                        | 84 (10)                                       | 395 (46.8)                                       |
| SaO <sub>2</sub> , %                           | 92 (88 – 95)                                      | 92 (87 – 96)                                  | 93 (88 – 96)                                     |
| Missing, no. (%)                               | 308 (36.5)                                        | 170 (20.1)                                    | 483 (57.2)                                       |
| PaO <sub>2</sub> /FiO <sub>2</sub> ratio, mmHg | 117 (78 – 175)                                    | –                                             | –                                                |
| Missing, no. (%)                               | 384 (45.5)                                        | –                                             | –                                                |
| Arterial pH                                    | 7.37 (7.30 – 7.44)                                | 7.36 (7.28 – 7.44)                            | 7.39 (7.32 – 7.45)                               |
| Missing, no. (%)                               | 264 (31.3)                                        | 93 (11)                                       | 399 (47.3)                                       |
| PaCO <sub>2</sub> , mmHg                       | 47 (38 – 57)                                      | 48 (39 – 59)                                  | 47 (40 – 56)                                     |
| Missing, no. (%)                               | 263 (31.2)                                        | 94 (11.1)                                     | 401 (47.5)                                       |
| Serum bicarbonate, mmol/L                      | 27 (23 – 31)                                      | 28 (23 – 32)                                  | 28 (24 – 32)                                     |
| Missing, no. (%)                               | 351 (41.6)                                        | 190 (22.5)                                    | 481 (57)                                         |
| Lactate, mmol/L                                | 1.6 (1.2 – 2.2)                                   | 1.7 (1.2 – 2.4)                               | 1.6 (1.2 – 2.2)                                  |
| Missing, no. (%)                               | 421 (49.9)                                        | 290 (34.4)                                    | 507 (60.1)                                       |
| ECMO flow, LPM                                 | –                                                 | 4.2 (3.6 – 4.7)                               | 4.2 (3.5 – 4.7)                                  |
| Missing, no. (%)                               | –                                                 | 391 (46.3)                                    | 537 (63.6)                                       |
| Gas flow, LPM                                  | –                                                 | 4.0 (3.0 – 5.0)                               | 4.5 (3.5 – 6.0)                                  |
| Missing, no. (%)                               | –                                                 | 402 (47.6)                                    | 539 (63.9)                                       |

The table shows crude, summarized data (medians with interquartile ranges) calculated from daily measurements of time-varying variables for a total of 844 patient who received Extracorporeal Membrane oxygenation (ECMO) therapy at any time point during follow-up. When interpreting the table, it must be considered that the median and confidence intervals are influenced by censoring and different measurement times relative to the baseline. Daily measurements do not necessarily reflect the worst or best value of the day. Also, the daily measurements might or might not align with the time point of ECMO cannulation.

**Table S8.** Unadjusted, cumulative probability of events at 60 days with 95% confidence intervals (CI).

|                                                                     | <b>Overall</b> |
|---------------------------------------------------------------------|----------------|
| n                                                                   | 7,345          |
| Estimated outcome at 60 days                                        |                |
| Probability of death in hospital, % (95% CI)                        | 35 (34 to 37)  |
| Probability of death in hospital for ECMO patients, % (95% CI)      | 50 (46 to 54)  |
| Probability of remaining in hospital, % (95% CI)                    | 6 (5 to 7)     |
| Probability of remaining in hospital for ECMO patients, % (95% CI)  | 16 (13 to 20)  |
| Probability of discharge alive, % (95% CI)                          | 59 (57 to 60)  |
| Probability of being discharged alive for ECMO patients, % (95% CI) | 34 (30 to 38)  |

The table shows unadjusted, cumulative probability of events at 60 days with 95% confidence intervals (CI), estimated using an Aalen-Johansen estimator. The probability for ECMO patients represents the cumulative probability of the event conditional on the receipt of ECMO therapy at any time point during follow-up.



### 3. Additional results (Tables S9 to S14)

List of figures and tables in the next pages:

- **Table S9.** Estimated risk of death or hospital discharge at 60 days in patients with COVID-19.
- **Table S10.** Influence of age on outcomes of patients with COVID-19.
- **Table S11.** Influence of various comorbidities on outcomes of patients with COVID-19.
- **Table S12.** Influence of the number of comorbidities on outcomes of patients with COVID-19.
- **Table S13.** Influence of the duration of mechanical ventilation preceding the initiation of ECMO therapy on treatment effectiveness.
- **Table S14.** Effects on outcomes if the decision of initiating extracorporeal membrane oxygenation (ECMO) had been based on different thresholds for the time-dependent ratio of arterial partial pressure of oxygen ( $\text{PaO}_2$ ) / fraction of inspiratory oxygen ( $\text{FiO}_2$ ).
- **Table S15.** Effects on outcomes if the decision of initiating extracorporeal membrane oxygenation (ECMO) had been based on different thresholds for time-dependent driving pressure ( $\Delta P$ ).

#### **Additional details:**

In the following, we provide additional details of the results of our primary and secondary analyses. We also report the results of control experiments that were used to detect potential model misspecification or uncontrolled confounding.

**Table S9.** Estimated risk of death or hospital discharge at 60 days in patients with COVID-19.

|                                   | <b>Conventional<br/>mechanical<br/>ventilation</b> | <b>ECMO therapy if<br/>PaO<sub>2</sub>/FiO<sub>2</sub> &lt;<br/>80mmHg</b> | <b>As-treated analysis<br/>(treatment as<br/>received)</b> |
|-----------------------------------|----------------------------------------------------|----------------------------------------------------------------------------|------------------------------------------------------------|
| <b>Absolute risk % (95% CI)</b>   |                                                    |                                                                            |                                                            |
| Mortality                         | 33.2 (31.8 to 34.6)                                | 26.0 (24.5 to 27.5)                                                        | 34.8 (33.4 to 36.1)                                        |
| Hospital discharge alive          | 60.6 (59.0 to 62.2)                                | 67.5 (65.7 to 69.3)                                                        | 58.3 (56.8 to 59.7)                                        |
| <b>Risk difference % (95% CI)</b> |                                                    |                                                                            |                                                            |
| Mortality                         | ..                                                 | -7.1 (-8.2 to -6.1)                                                        | 1.6 (1.0 to 2.2)                                           |
| Hospital discharge alive          | ..                                                 | 6.9 (5.9 to 8.0)                                                           | -2.4 (-2.9 to -1.8)                                        |
| <b>Risk ratio (95% CI)</b>        |                                                    |                                                                            |                                                            |
| Mortality                         | ..                                                 | 0.78 (0.75 to 0.82)                                                        | 1.05 (1.03 to 1.07)                                        |
| Hospital discharge alive          | ..                                                 | 1.11 (1.10 to 1.13)                                                        | 0.96 (0.95 to 0.97)                                        |

Interventions were compared to a treatment strategy with conventional mechanical ventilation without the use of extracorporeal membrane oxygenation therapy (ECMO). In the as-treated analysis, outcomes were compared between treatment as received (which could have included treatment with ECMO) and treatment with conventional mechanical ventilation without the use of ECMO. PaO<sub>2</sub>/FiO<sub>2</sub> = ratio of arterial pressure of oxygen / fraction of inspiratory oxygen. Sample size=7,345; Number of bootstrap samples=500.

**Table S10.** Influence of age on outcomes of patients with COVID-19.

|                                   | Estimated mortality                 |                                                                   | Estimated probability of discharge alive |                                                                   |
|-----------------------------------|-------------------------------------|-------------------------------------------------------------------|------------------------------------------|-------------------------------------------------------------------|
|                                   | Conventional mechanical ventilation | ECMO therapy if PaO <sub>2</sub> /FiO <sub>2</sub> ratio < 80mmHg | Conventional mechanical ventilation      | ECMO therapy if PaO <sub>2</sub> /FiO <sub>2</sub> ratio < 80mmHg |
| <b>Absolute risk % (95% CI)</b>   |                                     |                                                                   |                                          |                                                                   |
| < 50 years                        | 24.0<br>(21.2 to 26.8)              | 17.0<br>(14.0 to 20.1)                                            | 69.6<br>(66.5 to 72.6)                   | 76.3<br>(72.7 to 79.8)                                            |
| 50 to 64 years                    | 30.2<br>(28.0 to 32.5)              | 23.3<br>(20.8 to 25.8)                                            | 63.6<br>(61.1 to 66.1)                   | 70.1<br>(67.2 to 73.0)                                            |
| ≥ 65 years                        | 43.3<br>(40.7 to 45.8)              | 36.5<br>(33.6 to 39.5)                                            | 51.0<br>(48.3 to 53.7)                   | 57.7<br>(54.5 to 60.8)                                            |
| <b>Risk difference % (95% CI)</b> |                                     |                                                                   |                                          |                                                                   |
| < 50 years                        | ..                                  | -7.0<br>(-9.5 to -4.5)                                            | ..                                       | 6.7<br>(4.3 to 9.1)                                               |
| 50 to 64 years                    | ..                                  | -6.9<br>(-9.0 to -4.9)                                            | ..                                       | 6.5<br>(4.5 to 8.4)                                               |
| ≥ 65 years                        | ..                                  | -6.7<br>(-8.4 to -5.0)                                            | ..                                       | 6.6<br>(5.0 to 8.3)                                               |
| <b>Risk ratio (95% CI)</b>        |                                     |                                                                   |                                          |                                                                   |
| < 50 years                        | ..                                  | 0.71<br>(0.62 to 0.81)                                            | ..                                       | 1.10<br>(1.06 to 1.13)                                            |
| 50 to 64 years                    | ..                                  | 0.77<br>(0.71 to 0.84)                                            | ..                                       | 1.10<br>(1.07 to 1.13)                                            |
| ≥ 65 years                        | ..                                  | 0.84<br>(0.81 to 0.88)                                            | ..                                       | 1.13<br>(1.10 to 1.16)                                            |

Interventions were compared to a treatment strategy with conventional mechanical ventilation without the use of extracorporeal membrane oxygenation therapy (ECMO). PaO<sub>2</sub>/FiO<sub>2</sub> = ratio of arterial pressure of oxygen / fraction of inspiratory oxygen. Sample sizes: n=1,903 (age < 50 years), n=2,823 (age 50 to 64 years), and n=2619 (age ≥ 65 years); Number of bootstrap samples=500.

**Table S11.** Influence of various comorbidities on outcomes of patients with COVID-19.

|                                   | Estimated mortality                 |                                                                   | Estimated probability of discharge alive |                                                                   |
|-----------------------------------|-------------------------------------|-------------------------------------------------------------------|------------------------------------------|-------------------------------------------------------------------|
|                                   | Conventional mechanical ventilation | ECMO therapy if PaO <sub>2</sub> /FiO <sub>2</sub> ratio < 80mmHg | Conventional mechanical ventilation      | ECMO therapy if PaO <sub>2</sub> /FiO <sub>2</sub> ratio < 80mmHg |
| <b>Absolute risk % (95% CI)</b>   |                                     |                                                                   |                                          |                                                                   |
| No comorbidities                  | 24.3<br>(20.7 to 27.8)              | 19.5<br>(16.0 to 23.0)                                            | 69.1<br>(64.9 to 73.4)                   | 73.9<br>(69.4 to 78.5)                                            |
| Arterial hypertension             | 30.7<br>(28.8 to 32.6)              | 23.2<br>(21.1 to 25.2)                                            | 63.6<br>(61.5 to 65.7)                   | 71.1<br>(68.7 to 73.5)                                            |
| Diabetes                          | 43.8<br>(40.9 to 46.6)              | 34.6<br>(31.2 to 38.0)                                            | 51.4<br>(48.5 to 54.4)                   | 60.1<br>(56.5 to 63.8)                                            |
| Obesity                           | 39.4<br>(36.5 to 42.3)              | 28.4<br>(24.7 to 32.0)                                            | 54.5<br>(51.4 to 57.7)                   | 64.4<br>(60.4 to 68.4)                                            |
| <b>Risk difference % (95% CI)</b> |                                     |                                                                   |                                          |                                                                   |
| No comorbidities                  | ..                                  | -4.8<br>(-7.5 to -2.1)                                            | ..                                       | 4.8<br>(2.1 to 7.5)                                               |
| Arterial hypertension             | ..                                  | -7.5<br>(-9.0 to -6.1)                                            | ..                                       | 7.5<br>(6.1 to 8.9)                                               |
| Diabetes                          | ..                                  | -9.1<br>(-11.3 to -6.9)                                           | ..                                       | 8.7<br>(6.5 to 10.9)                                              |
| Obesity                           | ..                                  | -11.1<br>(-14.2 to -8.0)                                          | ..                                       | 9.8<br>(6.9 to 12.8)                                              |
| <b>Risk ratio (95% CI)</b>        |                                     |                                                                   |                                          |                                                                   |
| No comorbidities                  | ..                                  | 0.80<br>(0.70 to 0.91)                                            | ..                                       | 1.07<br>(1.03 to 1.11)                                            |
| Arterial hypertension             | ..                                  | 0.75<br>(0.71 to 0.80)                                            | ..                                       | 1.12<br>(1.10 to 1.14)                                            |
| Diabetes                          | ..                                  | 0.79<br>(0.74 to 0.84)                                            | ..                                       | 1.17<br>(1.13 to 1.21)                                            |
| Obesity                           | ..                                  | 0.72<br>(0.65 to 0.80)                                            | ..                                       | 1.18<br>(1.13 to 1.24)                                            |

Interventions were compared to a treatment strategy with conventional mechanical ventilation without the use of extracorporeal membrane oxygenation therapy (ECMO). PaO<sub>2</sub>/FiO<sub>2</sub> = ratio of arterial pressure of oxygen / fraction of inspiratory oxygen. Sample sizes: n=998 (No comorbidities), n=4,203 (arterial hypertension), n=1,887 (Diabetes), and n=1,603 (obesity); Number of bootstrap samples=500.

**Table S12.** Influence of the number of comorbidities on outcomes of patients with COVID-19.

|                                   | Estimated mortality                 |                                                                   | Estimated probability of discharge alive |                                                                   |
|-----------------------------------|-------------------------------------|-------------------------------------------------------------------|------------------------------------------|-------------------------------------------------------------------|
|                                   | Conventional mechanical ventilation | ECMO therapy if PaO <sub>2</sub> /FiO <sub>2</sub> ratio < 80mmHg | Conventional mechanical ventilation      | ECMO therapy if PaO <sub>2</sub> /FiO <sub>2</sub> ratio < 80mmHg |
| <b>Absolute risk % (95% CI)</b>   |                                     |                                                                   |                                          |                                                                   |
| ≤ 3 comorbidities                 | 27.8<br>(26.2 to 29.5)              | 21.8<br>(20.1 to 23.5)                                            | 65.7<br>(64.0 to 67.5)                   | 71.8<br>(69.8 to 73.8)                                            |
| > 3 comorbidities                 | 48.2<br>(45.3 to 51.0)              | 39.7<br>(36.3 to 43.1)                                            | 46.3<br>(43.4 to 49.2)                   | 53.7<br>(50.1 to 57.3)                                            |
| <b>Risk difference % (95% CI)</b> |                                     |                                                                   |                                          |                                                                   |
| ≤ 3 comorbidities                 | ..                                  | -6.0<br>(-7.4 to -4.7)                                            | ..                                       | 6.0<br>(4.7 to 7.4)                                               |
| > 3 comorbidities                 | ..                                  | -8.5<br>(-10.8 to -6.2)                                           | ..                                       | 7.4<br>(5.2 to 9.7)                                               |
| <b>Risk ratio (95% CI)</b>        |                                     |                                                                   |                                          |                                                                   |
| ≤ 3 comorbidities                 | ..                                  | 0.78<br>(0.74 to 0.83)                                            | ..                                       | 1.09<br>(1.07 to 1.11)                                            |
| > 3 comorbidities                 | ..                                  | 0.82<br>(0.78 to 0.87)                                            | ..                                       | 1.16<br>(1.11 to 1.21)                                            |

Interventions were compared to a treatment strategy with conventional mechanical ventilation without the use of extracorporeal membrane oxygenation therapy (ECMO). PaO<sub>2</sub>/FiO<sub>2</sub> = ratio of arterial pressure of oxygen / fraction of inspiratory oxygen. Sample sizes: n=5,709 (≤ 3 comorbidities) and n=1,636 (> 3 comorbidities); Number of bootstrap samples=500

**Table S13.** Influence of the duration of mechanical ventilation preceding the initiation of ECMO therapy on treatment effectiveness.

| Days of mechanical ventilation preceding ECMO therapy | Risk ratio (95% CI)    |                        | Risk difference (95% CI) |                     |
|-------------------------------------------------------|------------------------|------------------------|--------------------------|---------------------|
|                                                       | Death                  | Hospital discharge     | Death                    | Hospital discharge  |
| ≤1                                                    | 0.91<br>(0.88 to 0.94) | 1.04<br>(1.02 to 1.02) | -3.0<br>(-4.0 to -2.0)   | 2.2<br>(1.2 to 1.2) |
| 2                                                     | 0.90<br>(0.88 to 0.92) | 1.05<br>(1.04 to 1.04) | -3.3<br>(-4.0 to -2.7)   | 3.1<br>(2.5 to 2.5) |
| 3                                                     | 0.92<br>(0.91 to 0.94) | 1.04<br>(1.03 to 1.03) | -2.5<br>(-3.1 to -1.9)   | 2.3<br>(1.7 to 1.7) |
| 4                                                     | 0.93<br>(0.91 to 0.94) | 1.04<br>(1.03 to 1.03) | -2.5<br>(-3.0 to -1.9)   | 2.3<br>(1.8 to 1.8) |
| 5                                                     | 0.95<br>(0.94 to 0.96) | 1.03<br>(1.02 to 1.02) | -1.7<br>(-2.2 to -1.2)   | 1.6<br>(1.2 to 1.2) |
| 6                                                     | 0.96<br>(0.95 to 0.98) | 1.02<br>(1.01 to 1.01) | -1.3<br>(-1.8 to -0.8)   | 1.2<br>(0.7 to 0.7) |
| 7                                                     | 0.97<br>(0.95 to 0.98) | 1.02<br>(1.01 to 1.01) | -1.2<br>(-1.6 to -0.7)   | 1.1<br>(0.7 to 0.7) |
| 8                                                     | 0.97<br>(0.96 to 0.98) | 1.02<br>(1.01 to 1.01) | -1<br>(-1.4 to -0.7)     | 1<br>(0.6 to 0.6)   |
| 9                                                     | 0.98<br>(0.97 to 0.99) | 1.01<br>(1.01 to 1.01) | -0.8<br>(-1.1 to -0.4)   | 0.7<br>(0.4 to 0.4) |
| 10                                                    | 0.98<br>(0.97 to 0.99) | 1.01<br>(1.01 to 1.01) | -0.8<br>(-1.1 to -0.4)   | 0.7<br>(0.4 to 0.4) |
| 11                                                    | 0.98<br>(0.97 to 0.99) | 1.01<br>(1.01 to 1.01) | -0.8<br>(-1.0 to -0.5)   | 0.8<br>(0.5 to 0.5) |
| ≥12                                                   | 0.97<br>(0.96 to 0.98) | 1.02<br>(1.01 to 1.01) | -0.9<br>(-1.3 to -0.6)   | 0.9<br>(0.6 to 0.6) |

A treatment strategy, where extracorporeal membrane oxygenation therapy (ECMO) therapy had to be initiated if the ratio of arterial pressure of oxygen / fraction of inspiratory oxygen (PaO<sub>2</sub>/FiO<sub>2</sub>) was < 80mmHg, was compared to treatment with conventional mechanical ventilation without the use of ECMO. In the different scenarios, ECMO therapy could only be initiated if the preceding duration of mechanical ventilation was within the indicated range / corresponded to the indicated number of days. Sample size: n=7,345; Number of bootstrap samples=500.

**Table S14.** Effects on outcomes if the decision of initiating extracorporeal membrane oxygenation (ECMO) had been based on different thresholds for the time-dependent ratio of arterial partial pressure of oxygen (PaO<sub>2</sub>) / fraction of inspiratory oxygen (FiO<sub>2</sub>).

|                                                                                            | <b>Absolute risk %<br/>(95% CI)</b> | <b>Risk difference %<br/>(95% CI)</b> | <b>Risk ratio<br/>(95% CI)</b> |
|--------------------------------------------------------------------------------------------|-------------------------------------|---------------------------------------|--------------------------------|
| <b>Estimated mortality</b>                                                                 |                                     |                                       |                                |
| Conventional mechanical ventilation                                                        | 33.2<br>(31.8 to 34.6)              | ..                                    | ..                             |
| ECMO must only be initiated if:<br>PaO <sub>2</sub> /FiO <sub>2</sub> ≥ 80 and < 120 mmHg  | 29.0<br>(27.4 to 30.7)              | -4.2<br>(-5.4 to -2.9)                | 0.87<br>(0.84 to 0.91)         |
| ECMO must only be initiated if:<br>PaO <sub>2</sub> /FiO <sub>2</sub> ≥ 120 and < 150 mmHg | 34.8<br>(33.0 to 36.6)              | 1.6<br>(0.5 to 2.7)                   | 1.05<br>(1.02 to 1.08)         |
| ECMO therapy must be initiated in all patients                                             | 63.5<br>(57.1 to 69.9)              | 30.3<br>(23.9 to 36.8)                | 1.91<br>(1.72 to 2.13)         |
| <b>Estimated probability of hospital discharge alive</b>                                   |                                     |                                       |                                |
| Conventional mechanical ventilation                                                        | 60.3<br>(58.6 to 61.9)              | ..                                    | ..                             |
| ECMO must only be initiated if:<br>PaO <sub>2</sub> /FiO <sub>2</sub> ≥ 80 and < 120 mmHg  | 65.8<br>(63.9 to 67.6)              | 5.5<br>(4.3 to 6.7)                   | 1.09<br>(1.07 to 1.11)         |
| ECMO must only be initiated if:<br>PaO <sub>2</sub> /FiO <sub>2</sub> ≥ 120 and < 150 mmHg | 59.7<br>(57.7 to 61.7)              | -0.5<br>(-1.6 to 0.6)                 | 0.99<br>(0.97 to 1.01)         |
| ECMO therapy must be initiated in all patients                                             | 18.3<br>(13.6 to 23.1)              | -41.9<br>(-46.8 to -37.0)             | 0.30<br>(0.23 to 0.39)         |

Interventions were compared to a treatment strategy with conventional mechanical ventilation without the use of extracorporeal membrane oxygenation therapy (ECMO). Sample size=7,345. Number of bootstrap samples=500.

**Table S15.** Effects on outcomes if the decision of initiating extracorporeal membrane oxygenation (ECMO) had been based on different thresholds for time-dependent driving pressure ( $\Delta P$ ).

|                                                                  | <b>Absolute risk %<br/>(95% CI)</b> | <b>Risk difference %<br/>(95% CI)</b> | <b>Risk ratio<br/>(95% CI)</b> |
|------------------------------------------------------------------|-------------------------------------|---------------------------------------|--------------------------------|
| <b>Estimated mortality</b>                                       |                                     |                                       |                                |
| Conventional mechanical ventilation                              | 33.1<br>(31.6 to 34.5)              | ..                                    | ..                             |
| ECMO must be initiated if:<br>$\Delta P > 12$ cmH <sub>2</sub> O | 31.3<br>(29.1 to 33.5)              | -1.7<br>(-3.6 to 0.1)                 | 0.95<br>(0.89 to 1.00)         |
| ECMO must be initiated if:<br>$\Delta P > 15$ cmH <sub>2</sub> O | 29.5<br>(27.8 to 31.2)              | -3.6<br>(-4.7 to -2.5)                | 0.89<br>(0.86 to 0.93)         |
| ECMO must be initiated if:<br>$\Delta P > 17$ cmH <sub>2</sub> O | 30.1<br>(28.6 to 31.5)              | -3.0<br>(-3.7 to -2.2)                | 0.91<br>(0.89 to 0.93)         |
| ECMO must be initiated if:<br>$\Delta P > 20$ cmH <sub>2</sub> O | 32.9<br>(31.4 to 34.3)              | -0.2<br>(-0.7 to 0.4)                 | 0.99<br>(0.98 to 1.01)         |
| <b>Estimated probability of hospital discharge alive</b>         |                                     |                                       |                                |
| Conventional mechanical ventilation                              | 60.3<br>(58.7 to 61.9)              | ..                                    | ..                             |
| ECMO must be initiated if:<br>$\Delta P > 12$ cmH <sub>2</sub> O | 62.0<br>(59.6 to 64.4)              | 1.7<br>(-0.3 to 3.6)                  | 1.03<br>(1.00 to 1.06)         |
| ECMO must be initiated if:<br>$\Delta P > 15$ cmH <sub>2</sub> O | 63.6<br>(61.7 to 65.5)              | 3.3<br>(2.1 to 4.4)                   | 1.05<br>(1.04 to 1.07)         |
| ECMO must be initiated if:<br>$\Delta P > 17$ cmH <sub>2</sub> O | 62.7<br>(61.0 to 64.5)              | 2.4<br>(1.6 to 3.2)                   | 1.04<br>(1.03 to 1.05)         |
| ECMO must be initiated if:<br>$\Delta P > 20$ cmH <sub>2</sub> O | 60.2<br>(58.5 to 61.8)              | -0.2<br>(-0.7 to 0.4)                 | 1.00<br>(0.99 to 1.01)         |

Interventions were compared to a treatment strategy with conventional mechanical ventilation without the use of extracorporeal membrane oxygenation therapy (ECMO). Sample size=7,345. Number of bootstrap samples=500.



#### 4. Sensitivity analyses (Figures S3 to S5)

Please, refer to the figures and tables within the next pages.

- **Figure S3.** Influence of treatment on a random outcome variable with 50:50 probability.
- **Figure S4.** Sensitivity analysis using an alternative set of covariates for calculation of the inverse probability weights (IPW).
- **Figure S5.** Influence of potential confounding due to country-specific heterogeneity in treatment effectiveness.

#### **Additional details:**

In the following the results of sensitivity analyses are presented to detect potential model misspecifications or residual confounding.

**Figure S3.** Influence of treatment on a random outcome variable with 50:50 probability. A treatment strategy, where extracorporeal membrane oxygenation (ECMO) therapy had to be initiated if the ratio of arterial partial pressure of oxygen (PaO<sub>2</sub>) / fraction of inspiratory oxygen (FiO<sub>2</sub>) was < 80 mmHg, was compared to treatment with conventional mechanical ventilation without the use of ECMO. The curves show no effect which is as expected for this control outcome. The shaded areas represent 95% confidence intervals.

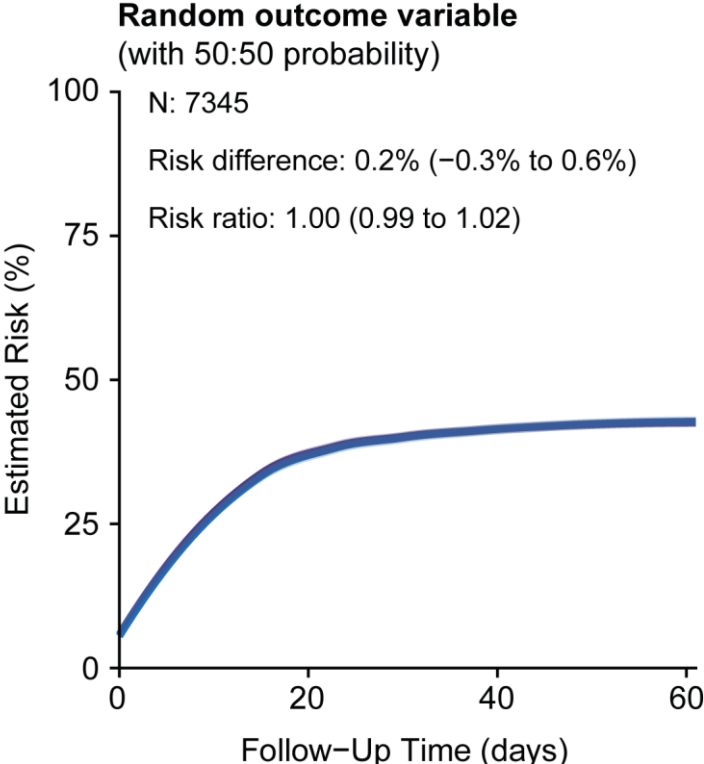

**Intervention**

- Conventional mechanical ventilation
- ECMO therapy if PaO<sub>2</sub>/FiO<sub>2</sub> < 80mmHg

**Figure S4.** Sensitivity analysis using an alternative set of covariates for calculation of the inverse probability weights (IPW). A treatment strategy, where extracorporeal membrane oxygenation (ECMO) therapy had to be initiated if the ratio of arterial partial pressure of oxygen ( $\text{PaO}_2$ ) / fraction of inspiratory oxygen ( $\text{FiO}_2$ ) was  $< 80$  mmHg, was compared to treatment with conventional mechanical ventilation without the use of ECMO. The following covariates were used for inverse probability weighting: age, presence of chronic neurological, cardiac, pulmonary, or liver disease, stage III kidney failure, malignant neoplasm, inability to walk, seizures, treatment with neuromuscular blockade, prone position, inhaled nitric oxide, treatment with vasoactive drugs, duration of mechanical ventilation. The shaded areas represent 95% confidence intervals.

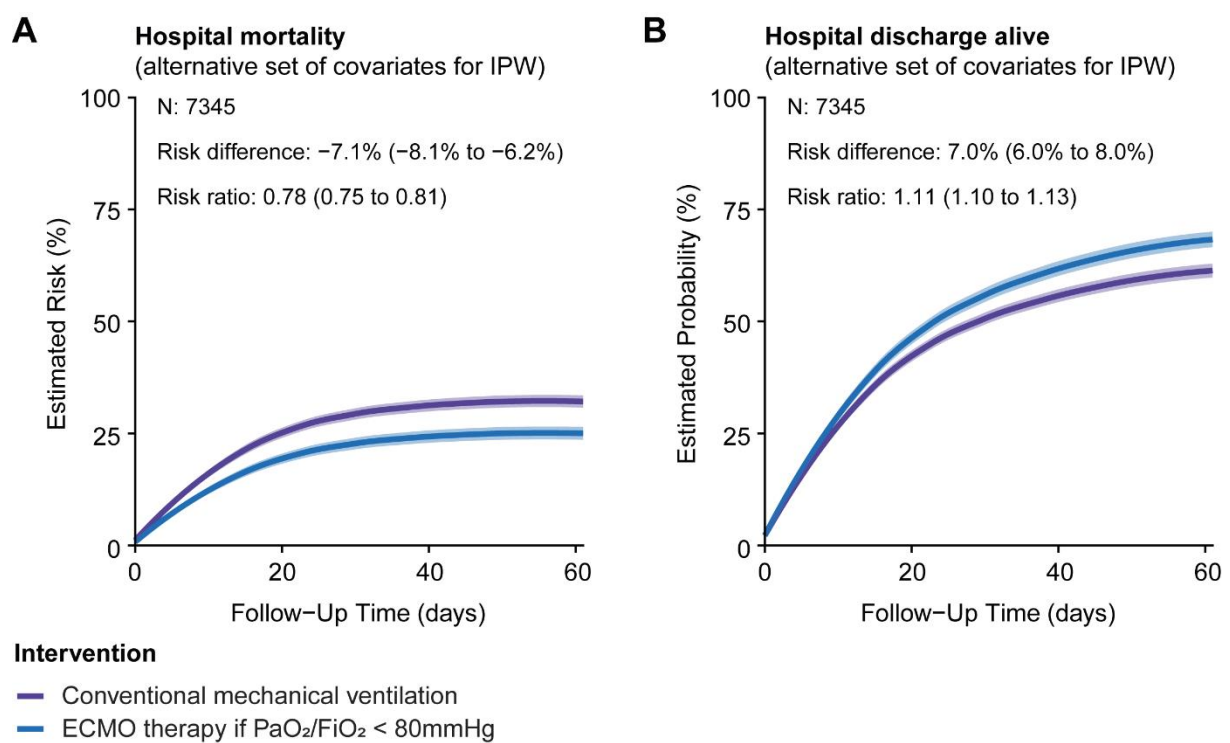

**Figure S5.** Influence of potential confounding due to country-specific heterogeneity in treatment effectiveness. A treatment strategy, where extracorporeal membrane oxygenation (ECMO) therapy had to be initiated if the ratio of arterial partial pressure of oxygen (PaO<sub>2</sub>) / fraction of inspiratory oxygen (FiO<sub>2</sub>) was < 80 mmHg, was compared to treatment with conventional mechanical ventilation without the use of ECMO. In a first analysis, we excluded patients from the United States of America (**panel A and B**). In a second analysis, inverse probability weighting to adjust for country-specific heterogeneity (**panel C and D**). The results were similar to the findings of the primary analysis. The shaded areas represent 95% confidence intervals.

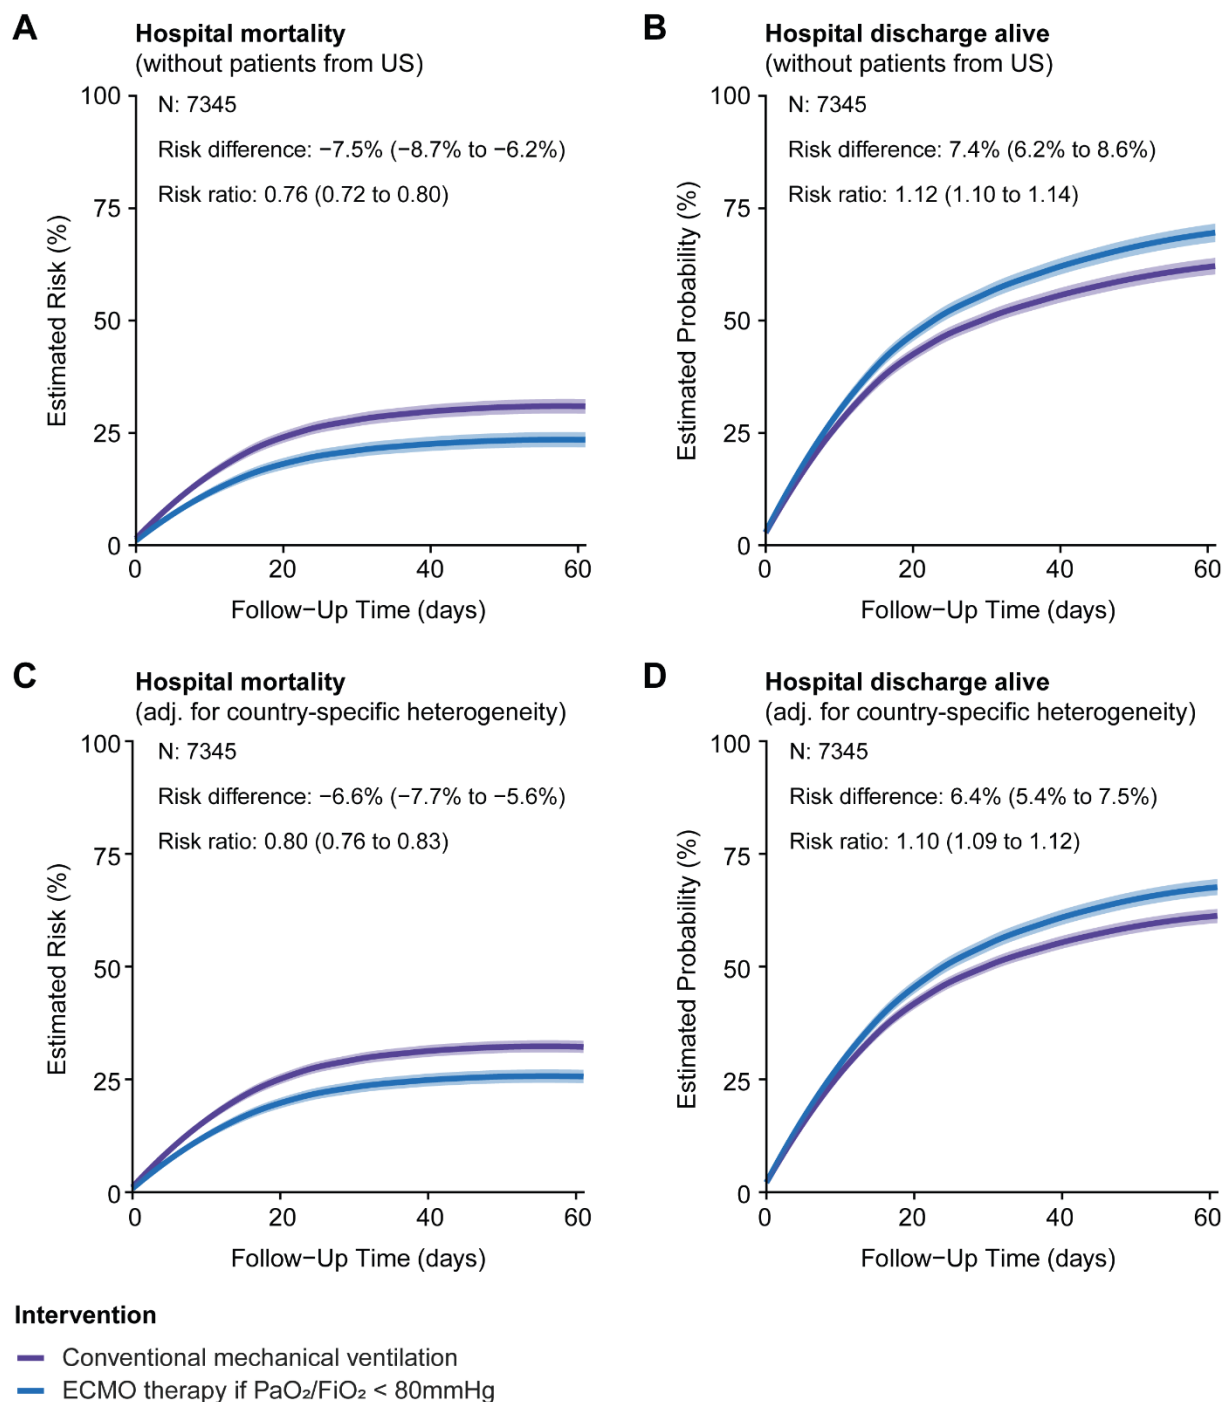

## 5. Missing data (Figure S6 and S7, Table S15)

Please, refer to the figures and tables within the next pages.

- **Figure S6.** Histograms of imputed and observed variables.
- **Table S16.** Missing baseline covariate data of variables used for computation of the inverse probability weights.
- **Figure S7.** Estimated effects on hospital mortality in patients with COVID-19 related respiratory failure in patients with complete measurements at baseline and without variable imputation.

### **Additional details:**

For the main analysis, we imputed missing measurements at baseline with the ‘mice’ package using fully conditionally specified models, including failure time and outcome. For longitudinal missing values, we carried the last observation forward, similar to previous work <sup>2</sup>. Carrying forward the last available value reflects what the treatment team would do in clinical practice at the bedside. We performed a complete case analysis with a reduced set of covariates for the calculation of the inverse probability weights to investigate the potential influence of missing variables.

**Figure S6.** Histograms of imputed and observed variables. APACHE II = Acute Physiology And Chronic Health Evaluation score II, PPlat = Plateau pressure. PEEP = positive end-expiratory pressure. Vt per PBW = Tidal volume per predicted body weight, PaCO<sub>2</sub> = arterial partial pressure of carbon dioxide, PaO<sub>2</sub> = arterial partial pressure of oxygen, SaO<sub>2</sub> = arterial oxygen saturation. SOFA = severity of organ failure assessment score.

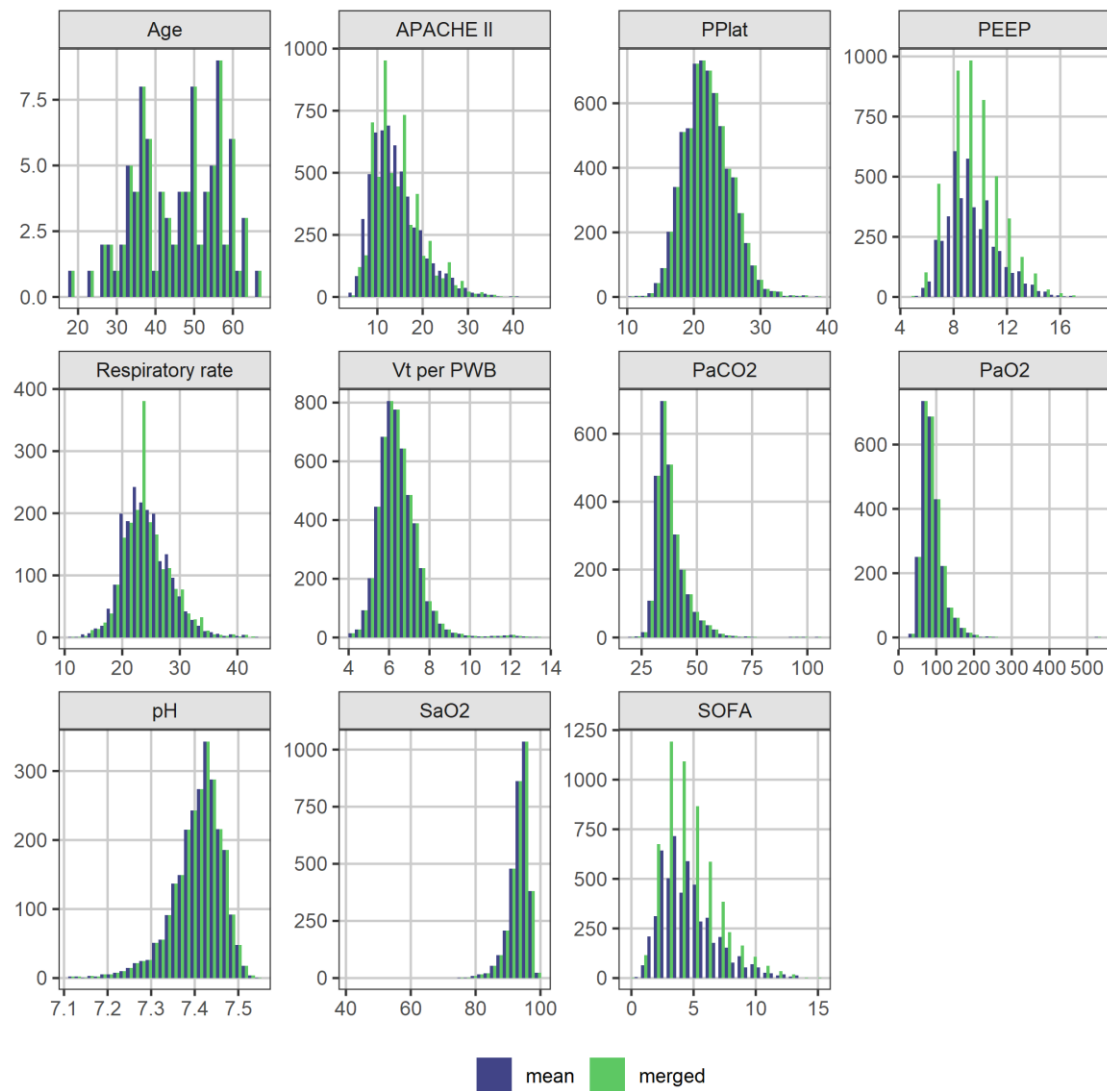

**Table S16.** Missing baseline covariate data of variables used for computation of the inverse probability weights.

| <b>Variable</b>                                 | <b>No. of missing values (%)</b> |
|-------------------------------------------------|----------------------------------|
| Age, years                                      | 91 (1.2)                         |
| Sex                                             | 0 (0)                            |
| Severity of illness and pre-existing conditions |                                  |
| APACHE II score                                 | 5,695 (77.5)                     |
| SOFA score                                      | 5,537 (75.4)                     |
| Inability to walk                               | 0 (0)                            |
| Seizure disorder                                | 0 (0)                            |
| Chronic cardiac disease                         | 0 (0)                            |
| Chronic pulmonary disease                       | 0 (0)                            |
| Severe liver failure                            | 0 (0)                            |
| Pre-existing kidney failure requiring dialysis  | 0 (0)                            |
| Chronic neurological disease                    | 0 (0)                            |
| Dementia                                        | 0 (0)                            |
| Malignant neoplasia                             | 0 (0)                            |
| Stage III kidney failure (composite variable)   |                                  |
| Creatinine levels, $\mu\text{mol/L}$            | 2,048 (27.8)                     |
| Renal replacement therapy                       | 2,794 (38.0)                     |
| Urine output, mL / kg / hr                      | 5,424 (73.8)                     |
| Ventilation parameters                          |                                  |
| Airway plateau pressure, $\text{cmH}_2\text{O}$ | 6,466 (88.0)                     |
| PEEP, $\text{cmH}_2\text{O}$                    | 4,468 (60.8)                     |
| $\text{PaO}_2 / \text{FiO}_2$ ratio             | 3,556 (48.4)                     |
| $\text{FiO}_2$                                  | 3,106 (42.3)                     |
| Arterial pH                                     | 2,538 (34.6)                     |
| Specific treatments                             |                                  |
| Vasoactive drugs                                | 0 (0)                            |
| Neuromuscular blockade                          | 0 (0)                            |
| Prone position                                  | 0 (0)                            |
| Inhaled nitric oxide                            | 0 (0)                            |

**Abbreviations:** APACHE II score = Acute Physiology And Chronic Health Evaluation II Score. SOFA score = Sequential Organ Failure Assessment score.  $\text{FiO}_2$  = fraction of inspired oxygen. PEEP = positive end-expiratory pressure.  $\text{PaO}_2$  = arterial partial pressure of oxygen.

**Figure S7.** Complete case analysis without variable imputation. A treatment strategy, where extracorporeal membrane oxygenation (ECMO) therapy had to be initiated if the ratio of arterial partial pressure of oxygen (PaO<sub>2</sub>) / fraction of inspiratory oxygen (FiO<sub>2</sub>) was < 80 mmHg, was compared to treatment with conventional mechanical ventilation without the use of ECMO. The following covariates were used for inverse probability weighting: age, presence of chronic neurological, cardiac, pulmonary, or liver disease, stage III kidney failure, malignant neoplasm, inability to walk, seizures, treatment with neuromuscular blockade, prone position, inhaled nitric oxide, treatment with vasoactive drugs, duration of mechanical ventilation. The results were similar to the findings of the primary analysis. The shaded areas represent 95% confidence intervals.

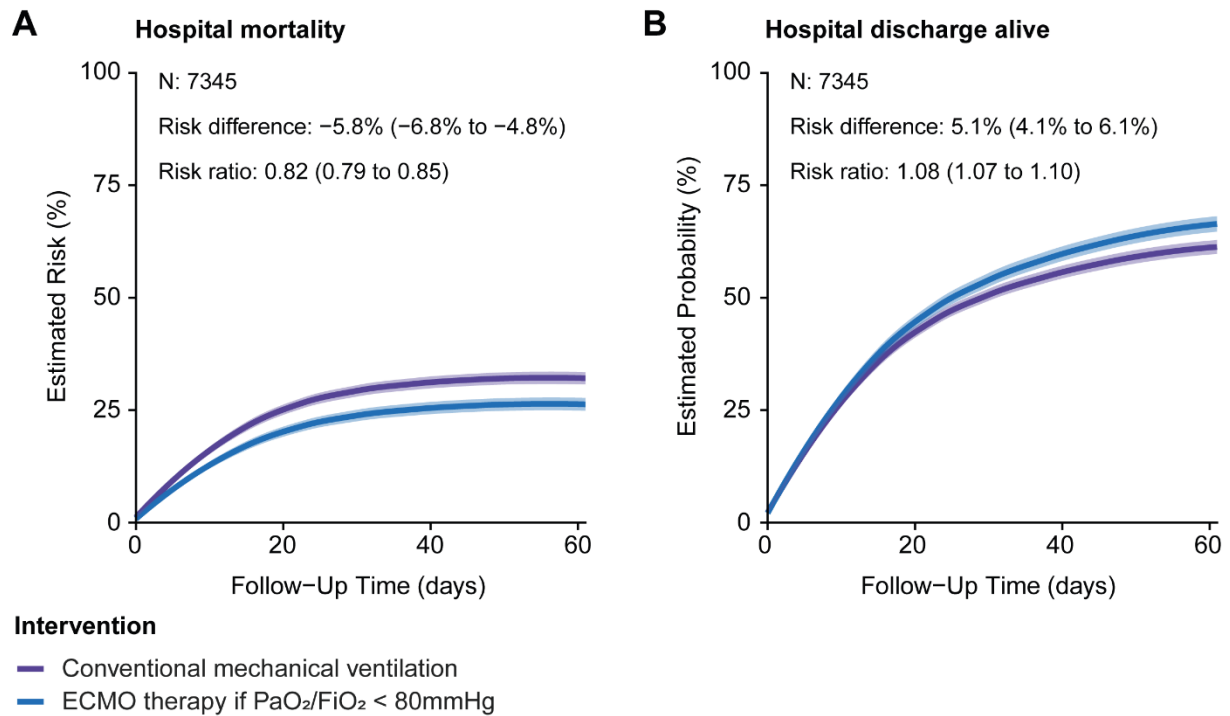



## 6. Contributors and collaborators (Table S17 and S18)

Please, refer to the figures and tables within the next pages.

- **Table S17.** List of contributors.
- **Table S18.** List of collaborators.

### **Additional details:**

We recognize the crucial importance of the ISARIC and SPRINT-SARI networks for the development and expansion of the COVID-19 Critical Care Consortium. We thank the generous support we received from ELSO and ECMONet. Finally, we acknowledge all members of the COVID-19 Critical Care Consortium and various collaborators (**Tables S17 and S18**).

**Table S17.** List of contributors.

| Prefix/First Name/Last Name                                                                                                       | Site Name                                                                                         |
|-----------------------------------------------------------------------------------------------------------------------------------|---------------------------------------------------------------------------------------------------|
| Tala Al-Dabbous<br>Dr Huda Alfoudri                                                                                               | Al Adan Hospital                                                                                  |
| Dr Subbarao Elapavaluru<br>Ashley Berg<br>Christina Horn                                                                          | Allegheny General Hospital                                                                        |
| Dr Stephan Schroll                                                                                                                | Barmherzige Bruder Regensburg                                                                     |
| Dr Jorge Velazco<br>Wanda Fikes<br>Ludmyla Ploskanych                                                                             | Baylor Scott & White Health - Temple                                                              |
| Dr Dan Meyer<br>Maysoon Shalabi-McGuire<br>Trent Witt<br>Ashley Ehlers                                                            | Baylor University Medical Centre, Dallas                                                          |
| Dr Lorenzo Grazioli                                                                                                               | Bergamo Hospital                                                                                  |
| Dr E. Wilson Grandin<br>Jose Nunez<br>Tiago Reyes                                                                                 | Beth Israel Deaconess Medical Centre                                                              |
| Dr Mark Joseph<br>Dr Brook Mitchell<br>Martha Tenzer                                                                              | Carilion Clinic                                                                                   |
| Dr Ryuzo Abe<br>Yosuke Hayashi                                                                                                    | Chiba University Graduate School of Medicine                                                      |
| Dr Hwa Jin Cho<br>Dr In Seok Jeong                                                                                                | Chonnam National University Hospital                                                              |
| Dr Nicolas Brozzi<br>Dr Jaime Hernandez-Montfort                                                                                  | Cleveland Clinic - Florida                                                                        |
| Omar Mehkri<br>Stuart Houltham                                                                                                    | Cleveland Clinic - Ohio                                                                           |
| Dr Jerónimo Graf<br>Rodrigo Perez                                                                                                 | Clinica Alemana De Santiago                                                                       |
| Dr Roderigo Diaz<br>Camila Delgado<br>Joyce González<br>Maria Soledad Sanchez                                                     | Clinica Las Condez                                                                                |
| Dr Diego Fernando Bautista Rincón<br>Melissa Bustamante Duque<br>Dr Angela Maria Marulanda Yanten                                 | Clinica Valle de Lilli                                                                            |
| Dr Dan Brodie                                                                                                                     | Columbia University Medical Centre                                                                |
| Dr Desy Rusmawatingtyas                                                                                                           | Dr Sardjito Hospital (Paediatrics)                                                                |
| Gabrielle Ragazzo                                                                                                                 | Emory University Healthcare System                                                                |
| Dr Azhari Taufik<br>Dr Margaretha Gunawan<br>Dr Vera Irawany<br>Muhammad Rayhan<br>Dr Elizabeth Yasmin Wardoyo                    | Fatmawati Hospital                                                                                |
| Dr Mauro Panigada<br>Dr Silvia Coppola<br>Dr Sebastiano Colombo<br>Dr Giacomo Grasselli<br>Dr Michela Leone<br>Dr Alberto Zanella | Fondazione IRCCS Policlinico of Milan (Fondazione IRCCS Ca' Granda Ospedale Maggiore Policlinico) |
| Prof Massimo Antonelli<br>Dr Simone Carelli                                                                                       | Fondazione Policlinico Universitario Agostino Gemelli IRCCS                                       |

| Prefix/First Name/Last Name                                                                                                                                        | Site Name                                                          |
|--------------------------------------------------------------------------------------------------------------------------------------------------------------------|--------------------------------------------------------------------|
| Domenico Grieco                                                                                                                                                    |                                                                    |
| Motohiro Asaki                                                                                                                                                     | Fujieda Municipal General Hospital                                 |
| Dr Kota Hoshino                                                                                                                                                    | Fukuoka University                                                 |
| Dr Leonardo Salazar<br>Laura Duarte                                                                                                                                | Fundación Cardiovascular de Colombia                               |
| Dr Joseph McCaffrey<br>Allison Bone                                                                                                                                | Geelong Hospital                                                   |
| Dr David Thomson<br>Dr Christel Arnold-Day<br>Jerome Cupido<br>Zainap Fanie<br>Dr Malcom Miller<br>Dr Lisa Seymore<br>Dawid van Straaten                           | Groote Schuur Hospital                                             |
| Dr Ibrahim Hassan<br>Dr Ali Ait Hssain<br>Jeffrey Aliudin<br>Al-Reem Alqahtani<br>Khoulod Mohamed<br>Ahmed Mohamed<br>Darwin Tan<br>Joy Villanueva<br>Ahmed Zaqout | Hamad General Hospital - Weill Cornell Medical College<br>in Qatar |
| Dr Ethan Kurtzman<br>Arben Ademi<br>Ana Dobrita<br>Khadija El Aoudi<br>Juliet Segura                                                                               | Hartford HealthCare                                                |
| Dr Gezy Giwangkencana                                                                                                                                              | Hasan Sadikin Hospital (Adult)                                     |
| Dr Shinichiro Ohshimo                                                                                                                                              | Hiroshima University                                               |
| Dr Koji Hoshino<br>Saito Hitoshi<br>Dr Yuka Uchinami                                                                                                               | Hokkaido University Hospital                                       |
| Dr Javier Osatnik                                                                                                                                                  | Hospital Alemán                                                    |
| Dr Anne Joosten                                                                                                                                                    | Hospital Civil Marie Curie                                         |
| Dr Antoni Torres<br>Ana Motos<br>Dr Minlan Yang                                                                                                                    | Hospital Clinic, Barcelona                                         |
| Carlos Luna                                                                                                                                                        | Hospital de Clínicas                                               |
| Francisco Arancibia                                                                                                                                                | Hospital del Tórax                                                 |
| Virginie Williams<br>Alexandre Noel                                                                                                                                | Hospital du Sacre Coeur (Universite de Montreal)                   |
| Dr Nestor Luque                                                                                                                                                    | Hospital Emergencia Ate Vitarte                                    |
| Dr Trieu Huynh Trung<br>Sophie Yacoub                                                                                                                              | Hospital for Tropical Diseases                                     |
| Marina Fantini                                                                                                                                                     | Hospital Mater Dei                                                 |
| Dr Ruth Noemi Jorge García<br>Dr Enrique Chicote Alvarez                                                                                                           | Hospital Nuestra Señora de Gracia                                  |
| Dr Anna Greti<br>Oscar Lomeli                                                                                                                                      | Hospital Puerta de Hierro                                          |
| Dr Adrian Ceccato                                                                                                                                                  | Hospital Universitari Sagrat Cor                                   |
| Dr Angel Sanchez                                                                                                                                                   | Hospital Universitario Sant Joan d'Alacant                         |
| Dr Ana Loza Vazquez                                                                                                                                                | Hospital Universitario Virgen de Valme                             |
| Dr Ferran Roche-Campo                                                                                                                                              | Hospital Verge de la Cinta de Tortosa                              |
| Dr Divina Tuazon                                                                                                                                                   | Houston Methodist Hospital                                         |

| Prefix/First Name/Last Name                                                                                                                                              | Site Name                                                 |
|--------------------------------------------------------------------------------------------------------------------------------------------------------------------------|-----------------------------------------------------------|
| Dr Toni Duculan                                                                                                                                                          |                                                           |
| Hiroaki Shimizu                                                                                                                                                          | Kakogawa Acute Care Medical Center, Hyogo                 |
| Marcelo Amato<br>Luciana Cassimiro<br>Flavio Pola<br>Francis Ribeiro<br>Guilherme Fonseca                                                                                | INCOR (Universidade de São Paulo)                         |
| Dr Heidi Dalton<br>Dr Mehul Desai<br>Dr Erik Osborn<br>Hala Deeb                                                                                                         | INOVA Fairfax Hospital                                    |
| Dr Antonio Arcadipane<br>Claudia Bianco<br>Raffaele Cuffaro<br>Gennaro Martucci<br>Giovanna Occhipinti<br>Matteo Rossetti<br>Chiara Vitiello                             | ISMETT                                                    |
| Dr Sung-Min Cho<br>Kate Calligy<br>Dr Glenn Whitman                                                                                                                      | Johns Hopkins                                             |
| Dr Hiroaki Shimizu<br>Dr Naoki Moriyama                                                                                                                                  | Kakogawa Acute Care Medical Center                        |
| Dr Jae-Burm Kim                                                                                                                                                          | Keimyung University Dong San Hospital                     |
| Dr Nobuya Kitamura<br>Takashi Shimazui                                                                                                                                   | Kimitsu Chuo Hospital                                     |
| Dr Abdullah Al-Hudaib<br>Dr Alyaa Elhazmi                                                                                                                                | King Faisal Specialist Hospital and Research Center       |
| Dr Johannes Gebauer                                                                                                                                                      | Klinikum Passau                                           |
| Dr Toshiki Yokoyama                                                                                                                                                      | Kouritu Tousei Hospital                                   |
| Dr Abdulrahman Al-Fares<br>Esam Alamad<br>Fatma Alawadhi<br>Kalthoum Alawadi<br>Dr Sarah Buabbas                                                                         | Kuwait ECLS program, Al-Amiri & Jaber Al-Ahmed Hospitals  |
| Dr Hiro Tanaka                                                                                                                                                           | Kyoto Medical Centre                                      |
| Dr Satoru Hashimoto<br>Masaki Yamazaki                                                                                                                                   | Kyoto Prefectural University of Medicine                  |
| Tak-Hyuck Oh                                                                                                                                                             | Kyung Pook National University Chilgok Hospital           |
| Dr Mark Epler<br>Dr Cathleen Forney<br>Jared Feister<br>Katherine Grobengieser<br>Louise Kruse<br>Joelle Williamson                                                      | Lancaster General Health                                  |
| Dr Eric Gnull<br>Dr Mara Caroline<br>Sasha Golden<br>Colleen Karaj<br>Sherry McDermott<br>Lynn Sher<br>Dr Timothy Shapiro<br>Lisa Thome<br>Mark Vanderland<br>Mary Welch | Lankenau Institute of Medical Research (Main Line Health) |

| Prefix/First Name/Last Name                                                                                                      | Site Name                                                   |
|----------------------------------------------------------------------------------------------------------------------------------|-------------------------------------------------------------|
| Prof Luca Brazzi                                                                                                                 | Le Molinette Hospital (Ospedale Molinette Torino)           |
| Dr Tawnya Ogston                                                                                                                 | Legacy Emanuel Medical Center                               |
| Dr Dave Nagpal<br>Karlee Fischer                                                                                                 | London Health Sciences Centre                               |
| Dr Roberto Lorusso<br>Maria de Piero                                                                                             | Maastricht University Medical Centre                        |
| Prof Mariano Esperatti                                                                                                           | Mar del Plata Medical Foundation Private Community Hospital |
| Dr Diarmuid O'Briain                                                                                                             | Maroondah Hospital                                          |
| Dr Edmund G. Carton                                                                                                              | Mater Misericordiae University Hospital                     |
| Ayan Sen<br>Amanda Palacios<br>Deborah Rainey                                                                                    | Mayo Clinic College of Medicine                             |
| Cassandra Seefeldt<br>Dr Lucia Durham<br>Dr Octavio Falcucci<br>Amanda Emmrich<br>Jennifer Guy<br>Carling Johns<br>Emily Neumann | Medical College of Wisconsin (Froedtert Hospital)           |
| Dr Nina Buchtele<br>Dr Michael Schwameis                                                                                         | Medical University of Vienna                                |
| Dr Stephanie-Susanne Stecher<br>Delila Singh<br>Dr Michaela Barnikel<br>Lukas Arenz                                              | Medizinische Klinik und Poliklinik II                       |
| Dr Akram Zaaqoq<br>Lan Anh Galloway<br>Caitlin Merley                                                                            | MedStar Washington Hospital Centre                          |
| Dr Marc Csete<br>Luisa Quesada<br>Isabela Saba                                                                                   | Mount Sinai Medical Centre                                  |
| Dr Daisuke Kasugai<br>Hiroaki Hiraiwa<br>Taku Tanaka                                                                             | Nagoya University Hospital                                  |
| Dr Eva Marwali                                                                                                                   | National Cardiovascular Center Harapan Kita (Paediatrics)   |
| Yih-Sharng Chen                                                                                                                  | National Taiwan University Hospital                         |
| Prof John Laffey                                                                                                                 | National University of Ireland Galway                       |
| Marlice VanDyk<br>Sarah MacDonald                                                                                                | Netcare Unitas ECMO Centre                                  |
| Dr Ian Seppelt                                                                                                                   | Nepean Hospital                                             |
| Dr Indrek Ratsep<br>Lauri Enneveer<br>Kristo Erikson<br>Dr Getter Oigus<br>Andra-Maris Post<br>Piret Sillaots                    | North Estonia Medical Centre                                |
| Dr Effe Mihelis                                                                                                                  | Northwell Health                                            |
| Mamoru Komats                                                                                                                    | Obihiro-Kosei General Hospital                              |
| Dr S. Veena Satyapriya<br>Dr Amar Bhatt<br>Marco Echeverria<br>Juan Fiorda<br>Alicia Gonzalez                                    | Ohio State University Medical Centre                        |

| Prefix/First Name/Last Name                                                                                                                      | Site Name                                                                 |
|--------------------------------------------------------------------------------------------------------------------------------------------------|---------------------------------------------------------------------------|
| Dr Nahush A. Mokadam<br>Johnny McKeown<br>Joshua Pasek<br>Haixia Shi<br>Alberto Uribe                                                            |                                                                           |
| Dr Rita Moreno                                                                                                                                   | Oklahoma Heart Institute                                                  |
| Bishoy Zakhary<br>Hannah Johnson<br>Nolan Pow                                                                                                    | Oregon Health and Science University Hospital (OHSU)                      |
| Dr Marco Cavana<br>Dr Alberto Cucino                                                                                                             | Ospedale di Arco (Trento hospital)                                        |
| Prof Giuseppe Foti<br>Dr Marco Giani<br>Dr Vincenzo Russotto                                                                                     | Ospedale San Gerardo                                                      |
| Prof Davide Chiumello<br>Valentina Castagna                                                                                                      | Ospedale San Paolo                                                        |
| Dr Andrea Dell'Amore                                                                                                                             | Padua University Hospital (Policlinico of Padova)                         |
| Dr Hoi-Ping Shum                                                                                                                                 | Pamela Youde Nethersole Eastern Hospital                                  |
| Dr Alain Vuysteke                                                                                                                                | Papworth Hospitals NHS Foundation Trust                                   |
| Dr Asad Usman<br>Andrew Acker<br>Blake Mergler<br>Nicolas Rizer<br>Federico Sertic<br>Benjamin Smood<br>Alexandra Sperry<br>Dr Madhu Subramanian | Penn Medicine (Hospital of the University of Pennsylvania)                |
| Dr Navy Lolong<br>Dr Ernita Akmal<br>Dr Erlina Burhan<br>Prof Menaldi Rasmin<br>Bhat Naivedh                                                     | Persahabatan General Hospital                                             |
| Dr Peter Barrett<br>Julia Daugherty<br>Dr David Dean                                                                                             | Piedmont Atlanta Hospital                                                 |
| Dr Antonio Loforte                                                                                                                               | Policlinico di S. Orsola, Università di Bologna                           |
| Dr Irfan Khan<br>Olivia DeSantis<br>Dr Mohammed Abraar Quraishi                                                                                  | Presbyterian Hospital Services, Albuquerque                               |
| Dr Gavin Salt                                                                                                                                    | Prince of Wales                                                           |
| Dr Dominic So<br>Darshana Kandamby                                                                                                               | Princess Margaret Hospital                                                |
| Dr Jose M. Mandei<br>Hans Natanael                                                                                                               | Prof Dr R. D. Kandou General Hospital - Paediatric                        |
| Eka YudhaLantang<br>Anastasia Lantang                                                                                                            | Prof Dr R. D. Kandou General Hospital - Adult                             |
| Anna Jung<br>Dr Terese Hammond                                                                                                                   | Providence Saint John's Health Centre                                     |
| George Ng<br>Dr Wing Yiu Ng                                                                                                                      | Queen Elizabeth Hospital, Hong Kong                                       |
| Dr Pauline Yeung                                                                                                                                 | Queen Mary Hospital                                                       |
| Dr Shingo Adachi                                                                                                                                 | Rinku general medical center (and Senshu trauma and critical care center) |
| Dr Pablo Blanco<br>Ana Prieto                                                                                                                    | Rio Hortega University Hospital                                           |

| Prefix/First Name/Last Name                                                                                | Site Name                                                            |
|------------------------------------------------------------------------------------------------------------|----------------------------------------------------------------------|
| Jesús Sánchez                                                                                              |                                                                      |
| Dr Meghan Nicholson                                                                                        | Rochester General Hospital                                           |
| Dr Michael Farquharson                                                                                     | Royal Adelaide Hospital                                              |
| Dr Warwick Butt<br>Alyssa Serratore<br>Carmel Delzoppo                                                     | Royal Children's Hospital                                            |
| Dr Pierre Janin<br>Elizabeth Yarad                                                                         | Royal North Shore Hospital                                           |
| Dr Richard Totaro<br>Jennifer Coles                                                                        | Royal Prince Alfred Hospital                                         |
| Robert Balk<br>Samuel Fox<br>James Hays<br>Esha Kapania<br>Pavel Mishin<br>Andy Vissing<br>Garrett Yantosh | Rush University, Chicago                                             |
| Dr Saptadi Yuliarito<br>Dr Kohar Hari Santoso<br>Dr Susanthi Djajalaksana                                  | Saiful Anwar Malang Hospital (Brawijaya University)<br>(Paediatrics) |
| Dr Arie Zainul Fatoni                                                                                      | Saiful Anwar Malang Hospital (Brawijaya University)<br>(Adult)       |
| Dr Masahiro Fukuda                                                                                         | Saiseikai Senri Hospital                                             |
| Prof Keibun Liu                                                                                            | Saiseikai Utsunomiya Hospital                                        |
| Prof Paolo Pelosi<br>Denise Battaglini                                                                     | San Martino Hospital                                                 |
| Dr Juan Fernando Masa Jiménez                                                                              | San Pedro de Alcantara Hospital                                      |
| Dr Sérgio Gaião<br>Dr Roberto Roncon-Albuquerque                                                           | São João Hospital Centre, Porto                                      |
| Jessica Buchner                                                                                            | Sentara Norfolk General Hospital                                     |
| Dr Young-Jae Cho<br>Dr Sang Min Lee                                                                        | Seoul National University Hospital                                   |
| Dr Su Hwan Lee                                                                                             | Severance Hospital                                                   |
| Dr Tatsuya Kawasaki                                                                                        | Shizuoka Children's Hospital                                         |
| Dr Pranya Sakiyalak<br>Prompak Nitayavardhana                                                              | Siriraj Hospital                                                     |
| Dr Tamara Seitz                                                                                            | Sozialmedizinisches Zentrum Süd - Kaiser-Franz-Josef-Spital          |
| Rakesh Arora<br>David Kent                                                                                 | St Boniface Hospital (University of Manitoba)                        |
| Dr Swapnil Parwar<br>Andrew Cheng<br>Jennene Miller                                                        | St George Hospital                                                   |
| Daniel Marino<br>Jillian E Deacon                                                                          | St. Christopher's Hospital for Children                              |
| Dr Shigeki Fujitani<br>Dr Naoki Shimizu                                                                    | St Marianna Medical University hospital                              |
| Dr Jai Madhok<br>Dr Clark Owyang                                                                           | Stanford University Hospital                                         |
| Dr Hergen Buscher<br>Claire Reynolds                                                                       | St Vincent's Hospital                                                |
| Dr Olavi Maasikas<br>Dr Aleksandr Beljantsev<br>Vladislav Mihnovits                                        | Tartu University Hospital                                            |
| Dr Takako Akimoto                                                                                          | Teine Keijinkai Hospital                                             |

| Prefix/First Name/Last Name                                                                                  | Site Name                                                                                                                   |
|--------------------------------------------------------------------------------------------------------------|-----------------------------------------------------------------------------------------------------------------------------|
| Mariko Aizawa<br>Dr Kanako Horibe<br>Ryota Onodera                                                           |                                                                                                                             |
| Prof Carol Hodgson<br>Meredith Young                                                                         | The Alfred Hospital                                                                                                         |
| Timothy Smith<br>Cheryl Bartone                                                                              | The Christ Hospital                                                                                                         |
| Dr Timothy George                                                                                            | The Heart Hospital Baylor Plano, Plano                                                                                      |
| Dr Kiran Shekar<br>Niki McGuinness<br>Lacey Irvine                                                           | The Prince Charles Hospital                                                                                                 |
| Brigid Flynn<br>Abigail Houchin                                                                              | The University of Kansas Medical Centre                                                                                     |
| Dr Keiki Shimizu<br>Jun Hamaguchi                                                                            | Tokyo Metropolitan Medical Center                                                                                           |
| Leslie Lussier<br>Grace Kersker<br>Dr John Adam Reich                                                        | Tufts Medical Centre (and Floating Hospital for Children)                                                                   |
| Dr Gösta Lotz                                                                                                | Universitätsklinikum Frankfurt (University Hospital Frankfurt)(Uniklinik)                                                   |
| Dr Maximilian Malfertheiner<br>Dr Esther Dreier<br>Dr Lars Maier                                             | Universitätsklinikum Regensburg (Klinik für Innere Medizin II)                                                              |
| Dr Neurinda Permata Kusumastuti                                                                              | University Airlangga Hospital (Paediatric)                                                                                  |
| Dr Colin McCloskey<br>Dr Al-Awwab Dabaliz<br>Dr Tarek B Elshazly<br>Josiah Smith                             | University Hospital Cleveland Medical Centre (UH Cleveland hospital)                                                        |
| Dr Konstanty S. Szuldrzynski<br>Dr Piotr Bielański                                                           | University Hospital in Krakow                                                                                               |
| Dr Yusuff Hakeem                                                                                             | University Hospitals of Leicester NHS Trust (Glenfield Hospital)                                                            |
| Dr Keith Wille<br>Rebecca Holt                                                                               | University of Alabama at Birmingham Hospital (UAB)                                                                          |
| Dr Ken Kuljit S. Parhar<br>Dr Kirsten M. Fiest<br>Cassidy Codan<br>Anmol Shahid                              | University of Calgary (Peter Lougheed Centre, Foothills Medical Centre, South Health Campus and Rockyview General Hospital) |
| Dr Mohamed Fayed<br>Dr Timothy Evans<br>Rebekah Garcia<br>Ashley Gutierrez<br>Hiroaki Shimizu                | University of California, San Francisco-Fresno Clinical Research Centre                                                     |
| Dr Tae Song<br>Rebecca Rose                                                                                  | University of Chicago                                                                                                       |
| Dr Suzanne Bennett<br>Denise Richardson                                                                      | University of Cincinnati Medical Centre                                                                                     |
| Dr Giles Peek<br>Dalia Lopez-Colon                                                                           | University of Florida                                                                                                       |
| Dr Lovkesh Arora<br>Kristina Rappaport<br>Kristina Rudolph<br>Zita Sibenaller<br>Lori Stout<br>Alicia Walter | University of Iowa                                                                                                          |



| Prefix/First Name/Last Name                                                                                                                                                                                                                                                                               | Site Name                                                  |
|-----------------------------------------------------------------------------------------------------------------------------------------------------------------------------------------------------------------------------------------------------------------------------------------------------------|------------------------------------------------------------|
| Dr Daniel Herr<br>Nazli Vedadi                                                                                                                                                                                                                                                                            | University of Maryland - Baltimore                         |
| Dr Lace Sindt<br>Cale Ewald<br>Julie Hoffman<br>Sean Rajnic<br>Shaun Thompson                                                                                                                                                                                                                             | University of Nebraska Medical Centre                      |
| Dr Ryan Kennedy                                                                                                                                                                                                                                                                                           | University of Oklahoma Health Sciences Centre (OU)         |
| Dr Matthew Griffiee<br>Dr Anna Ciullo<br>Yuri Kida                                                                                                                                                                                                                                                        | University of Utah Hospital                                |
| Dr Ricard Ferrer Roca<br>Cynthia Alegre<br>Dr Sofia Contreras<br>Dr Jordi Riera                                                                                                                                                                                                                           | Vall d'Hebron University Hospital, Barcelona               |
| Dr Christy Kay<br>Irene Fischer<br>Elizabeth Renner                                                                                                                                                                                                                                                       | Washington University in St. Louis/ Barnes Jewish Hospital |
| Dr Hayato Taniguci                                                                                                                                                                                                                                                                                        | Yokohama City University Medical Center                    |
| Gabriella Abbate<br>Halah Hassan<br>Dr Silver Heinsar<br>Varun A Karnik<br>Dr Katrina Ki<br>Hollier F. O'Neill<br>Dr Nchafatso Obonyo<br>Dr Leticia Pretti Pimenta<br>Janice D. Reid<br>Dr Kei Sato<br>Dr Kiran Shekar<br>Aapeli Vuorinen<br>Dr Karin S. Wildi<br>Emily S. Wood<br>Dr Stephanie Yerkovich | COVID-19 Critical Care Consortium                          |

**Table S18.** List of collaborators.

| Prefix/First Name/Last Name                         | Site Name                                                            |
|-----------------------------------------------------|----------------------------------------------------------------------|
| Dr Emma Hartley                                     | Aberdeen Royal Infirmary (Foresterhill Health Campus)                |
| Bastian Lubis                                       | Adam Malik Hospital                                                  |
| Takanari Ikeyama                                    | Aichi Childrens Health and Medical Center                            |
| Balu Bhaskar                                        | American Hospital                                                    |
| Dr Jae-Seung Jung                                   | Anam Korea University Hospital                                       |
| Sandra Rossi Marta<br>Fabio Guarracino              | Azienda Ospedaliero Universitaria Parma                              |
| Prof Fabio Guarracino                               | Azienda Ospedaliero Universitaria Pisana                             |
| Stacey Gerle                                        | Banner University Medical Centre                                     |
| Emily Coxon                                         | Baptist Health Louisville                                            |
| Dr Bruno Claro                                      | Barts Hospital                                                       |
| Dr. Gonzo Gonzalez-Stawinski                        | Baylor All Saints Medical Centre, Forth Worth                        |
| Daniel Loverde                                      | Billings Clinic                                                      |
| Dr Vieri Parrini                                    | Borgo San Lorenzo Hospital                                           |
| Dr Diarmuid O'Briain<br>Stephanie Hunter            | Box Hill Hospital                                                    |
| Dr Angela McBride                                   | Brighton and Sussex Medical School                                   |
| Kathryn Negaard<br>Dr Phillip Mason                 | Brooke Army Medical Centre                                           |
| Dr Angela Ratsch                                    | Bundaberg Hospital                                                   |
| Dr Mahesh Ramanan<br>Julia Affleck                  | Caboolture Hospital                                                  |
| Ahmad Abdelaziz                                     | Cairo University Hospital                                            |
| Dr Sumeet Rai<br>Josie Russell-Brown<br>Mary Nourse | Canberra Hospital                                                    |
| Juan David Uribe                                    | Cardio VID                                                           |
| Dr Adriano Peris                                    | Careggi Hospital                                                     |
| Mark Sanders                                        | Cedar Park Regional Medical Center                                   |
| Dominic Emerson                                     | Cedars-Sinai Medical Centre                                          |
| Muhammad Kamal                                      | Cengkareng Hospital                                                  |
| Prof Pedro Pova                                     | Centro Hospitalar de Lisboa                                          |
| Dr Roland Francis                                   | Charite-Universitätsmedizin Berlin                                   |
| Ali Cherif                                          | Charles Nicolle University Hospital                                  |
| Dr Sunimol Joseph                                   | Children's Health Ireland (CHI) at Crumlin                           |
| Dr Matteo Di Nardo                                  | Children's Hospital Bambino Gesù                                     |
| Micheal Heard                                       | Children's Healthcare of Atlanta- Egleston Hospital                  |
| Kimberly Kyle                                       | Children's Hospital                                                  |
| Ray A Blackwell                                     | Christiana Care Health System's Centre for Heart and Vascular Health |
| Dr Michael Piagnerelli<br>Dr Patrick Biston         | CHU de Charleroi                                                     |

| Prefix/First Name/Last Name                             | Site Name                                                              |
|---------------------------------------------------------|------------------------------------------------------------------------|
| Hye Won Jeong                                           | Chungbuk National University Hospital                                  |
| Reanna Smith                                            | Cincinnati Children's                                                  |
| Yogi Prawira                                            | Cipto Mangunkusumo Hospital                                            |
| Dr Giorgia Montrucchio<br>Dr Gabriele Sales             | Città della Salute e della Scienza Hospital – Turin, Italy             |
| Nadeem Rahman<br>Vivek Kakar                            | Cleveland Clinic, Abu Dhabi                                            |
| Dr Michael Piagnerelli<br>Dr Josefa Valenzuela Sarrazin | Clinica Las Condes                                                     |
| Dr Arturo Huerta Garcia                                 | Clínica Sagrada Família                                                |
| Dr Bart Meyns                                           | Collaborative Centre Department Cardiac Surgery, UZ Leuven             |
| Marsha Moreno                                           | Dignity Health Medical Group- Dominican                                |
| Rajat Walia                                             | Dignity Health St. Joseph's Hospital and Medical Center (SJHMC)        |
| Dr Annette Schweda                                      | Donaustauf hospital                                                    |
| Cenk Kirakli                                            | Dr. Suat Seren Chest Diseases and Surgery Practice and Training Centre |
| Estefania Giraldo                                       | Fundación Clínica Shaio (Shaio Clinic)                                 |
| Dr Wojtek Karolak                                       | Gdansk Medical University                                              |
| Dr Martin Balik                                         | General University Hospital                                            |
| Elizabeth Pocock                                        | George Washington University Hospital                                  |
| Evan Gajkowski                                          | Giesinger Medical Centre                                               |
| Dr James Winearls<br>Mandy Tallott                      | Gold Coast University Hospital                                         |
| Kanamoto Masafumi                                       | Gunma University Graduate School of Medicine                           |
| Dr Nicholas Barrett                                     | Guy's and St Thomas NHS Foundation Trust Hospital                      |
| Yoshihiro Takeyama                                      | Hakodate City Hospital                                                 |
| Sunghoon Park                                           | Hallym University Sacred Heart Hospital                                |
| Faizan Amin                                             | Hamilton General Hospital                                              |
| Dr Erina Fina                                           | Hasan Sadikin Hospital                                                 |
| Dr Serhii Sudakevych                                    | Heart Institute Ministry of Health of Ukraine                          |
| Dr Angela Ratsch                                        | Hervey Bay Hospital                                                    |
| Patrícia Schwarz<br>Ana Carolina Mardini                | Hospital de Clínicas de Porto Alegre                                   |
| Ary Serpa Neto                                          | Hospital Israelita Albert Einstein                                     |
| Dr Andrea Villoldo                                      | Hospital Privado de Comunidad                                          |
| Alexandre Siciliano Colafranceschi                      | Hospital Pro Cardíaco                                                  |
| Dr Alejandro Ubeda Iglesias                             | Hospital Punta de Europa                                               |
| Livia Maria Garcia Melro<br>Giovana Fioravante Romualdo | Hospital Samaritano Paulista                                           |
| Diego Gaia                                              | Hospital Santa Catarina                                                |
| Helmton Souza                                           | Hospital Santa Marta                                                   |
| Dr Diego Bastos                                         | Hospital Cura D'ars Fortaleza                                          |

| Prefix/First Name/Last Name              | Site Name                                                                            |
|------------------------------------------|--------------------------------------------------------------------------------------|
| Filomena Galas                           | Hospital Sirio Libanes                                                               |
| Dr Rafael Máñez Mendiluce                | Hospital Universitario de Bellvitge                                                  |
| Alejandra Sosa                           | Hospital Universitario Esperanza (Universidad Francisco Marroquin)                   |
| Dr Ignacio Martinez                      | Hospital Universitario Lucus Augusti                                                 |
| Hiroshi Kurosawa                         | Hyogo Prefectural Kobe Children's Hospital                                           |
| Juan Salgado                             | Indiana University Health                                                            |
| Dr Beate Hugi-Mayr                       | Inselspital University Hospital                                                      |
| Eric Charbonneau                         | Institut Universitaire de Cardiologie et de Pneumologie de Quebec - Universite Laval |
| Vitor Salvatore Barzilai                 | Instituto de Cardiologia do Distrito Federal - ICDF                                  |
| Veronica Monteiro                        | Instituto de Medicina Integral Prof. Fernando Figueira (IMIP)                        |
| Rodrigo Ribeiro de Souza                 | Instituto Goiano de Diagnostico Cardiovascular (IGDC)                                |
| Michael Harper                           | INTEGRIS Baptist Medical Center                                                      |
| Hiroyuki Suzuki                          | Japan Red Cross Maebashi Hospital                                                    |
| Celina Adams                             | John C Lincoln Medical Centre                                                        |
| Dr Jorge Brieva                          | John Hunter Hospital                                                                 |
| George Nyale                             | Kenyatta National Hospital (KNH)                                                     |
| Jihan Fatani<br>Dr Faisal Saleem Eltatar | King Abdullah Medical City Specialist Hospital                                       |
| Dr. Husam Baeissa                        | King Abdullah Medical Complex                                                        |
| Ayman AL Masri                           | King Salman Hospital NAWAF                                                           |
| Yee Hui Mok                              | KK Women's and Children's Hospital                                                   |
| Masahiro Yamane                          | KKR Medical Center                                                                   |
| Hanna Jung                               | Kyung Pook National University Hospital                                              |
| Dr Matthew Brain<br>Sarah Mineall        | Launceston General Hospital                                                          |
| Rhonda Bakken                            | M Health Fairview                                                                    |
| Dr Tim Felton                            | Manchester University NHS Foundation Trust - Wythenshawe                             |
| Lorenzo Berra                            | Massachusetts General Hospital                                                       |
| Gordan Samoukoviv<br>Dr Josie Campisi    | McGill University Health Centre                                                      |
| Bobby Shah                               | Medanta Hospital                                                                     |
| Arpan Chakraborty                        | Medica Super speciality Hospital                                                     |
| Monika Cardona                           | Medical University of South Carolina                                                 |
| Harsh Jain                               | Mercy Hospital of Buffalo                                                            |
| Dr Asami Ito                             | Mie University Hospital                                                              |
| Brahim Housni                            | Mohammed VI University hospital                                                      |
| Dafsah Arifa Juzar                       | National Cardiovascular Center Harapan Kita (Adult)                                  |
| Sennen Low                               | National Centre for Infectious Diseases                                              |
| Dr. Koji Iihara                          | National Cerebral and Cardiovascular Center                                          |
| Joselito Chavez                          | National Kidney and Transplant Institute                                             |
| Dr Kollengode Ramanathan                 | National University Hospital, Singapore                                              |

| Prefix/First Name/Last Name                        | Site Name                                                                |
|----------------------------------------------------|--------------------------------------------------------------------------|
| Gustavo Zabert                                     | National University of Comahue                                           |
| Krubin Naidoo                                      | Nelson Mandela Children's Hospital                                       |
| Singo Ichiba                                       | Nippon Medical School Hospital                                           |
| Randy McGregor                                     | Northwestern Medicine                                                    |
| Teka Siebenaler                                    | Norton Children's Hospital                                               |
| Hannah Flynn                                       | Novant Health (NH) Presbyterian Medical Centre                           |
| Julia Garcia-Diaz<br>Catherine Harmon              | Ochsner Clinic Foundation                                                |
| Kristi Lofton                                      | Ochsner LSA Health Shreveport                                            |
| Toshiyuki Aokage                                   | Okayama University Hospital                                              |
| Kazuaki Shigemitsu                                 | Osaka City General Hospital                                              |
| Dr Andrea Moscatelli                               | Ospedale Gaslini                                                         |
| Dr Giuseppe Fiorentino                             | Ospedali dei Colli                                                       |
| Dr Matthias Baumgaertel                            | Paracelsus Medical University Nuremberg                                  |
| Serge Eddy Mba                                     | Parirenyatwa General Hospital                                            |
| Jana Assy                                          | Pediatric and Neonatal Cardiac intensive care at the American University |
| Holly Roush                                        | Penn State Heath S. Hershey Medical Centre                               |
| Kay A Sichtung                                     | Peyton Manning Children's Hospital                                       |
| Dr Francesco Alessandri                            | Policlinico Umberto, Sapienza University of Rome                         |
| Debra Burns                                        | Presbyterian Hospital, New York/ Weill Cornell Medical Centre            |
| Ahmed Rabie                                        | Prince Mohammed bin Abdulaziz Hospital                                   |
| Carl P. Garabedian                                 | Providence Sacred Heart Children's Hospital                              |
| Dr Jonathan Millar<br>Dr Malcolm Sim               | Queen Elizabeth II University Hospital                                   |
| Dr Adrian Mattke                                   | Queensland Children's Hospital                                           |
| Dr Danny McAuley                                   | Queens University of Belfast                                             |
| Jawad Tadili                                       | Rabat university hospital                                                |
| Dr Tim Frenzel                                     | Radboud University Medical Centre                                        |
| Aaron Blandino Ortiz                               | Ramón y Cajal University Hospital                                        |
| Jackie Stone                                       | Rapha Medical Centre                                                     |
| Dr Alexis Tabah<br>Megan Ratcliffe<br>Maree Duroux | Redcliffe Hospital                                                       |
| Dr Antony Attokaran                                | Rockhampton Hospital                                                     |
| Dr Brij Patel                                      | Royal Brompton & Harefield NHS Foundation Trust                          |
| Derek Gunning                                      | Royal Columbian Hospital                                                 |
| Dr Kenneth Baillie                                 | Royal Infirmary Edinburgh                                                |
| Dr Pia Watson                                      | Sahlgrenska University Hospital                                          |
| Kenji Tamai                                        | Saiseikai Yokohamashi Tobu Hospital                                      |
| Dr Gede Ketut Sajinadiyasa<br>Dr Dyah Kanyawati    | Sanglah General Hospital                                                 |
| Marcello Salgado                                   | Santa Casa de Misericordia de Juiz de Fora                               |

| Prefix/First Name/Last Name     | Site Name                                                                |
|---------------------------------|--------------------------------------------------------------------------|
| Assad Sassine                   | Santa Casa de Misericórdia de Vitoria                                    |
| Dr Bhirowo Yudo                 | Sardjito Hospital                                                        |
| Scott McCaul                    | Scripps Memorial Hospital La Jolla                                       |
| Bongjin Lee                     | Seoul National University Children's Hospital                            |
| Yoshiaki Iwashita               | Shimane University Hospital                                              |
| Laveena munshi                  | Sinai Health Systems (Mount Sinai Hospital)                              |
| Dr Neurinda Permata Kusumastuti | Soetomo General Hospital (FK UNAIR)                                      |
| Dr Nicole Van Belle             | St. Antonius Hospital                                                    |
| Ignacio Martin-Loeches          | St James's University Hospital                                           |
| Dr Hergen Buscher               | St Vincent's Hospital, Sydney                                            |
| Surya Oto Wijaya                | Sulianti Saroso Hospital                                                 |
| Dr Lenny Ivatt                  | Swansea Hospital                                                         |
| Chia Yew Woon                   | Tan Tock Seng Hospital                                                   |
| Hyun Mi Kang                    | The Catholic University of Seoul St Mary Hospital                        |
| Erskine James                   | The Medical Centre Navicent Health                                       |
| Nawar Al-Rawas                  | Thomas Jefferson University Hospital                                     |
| Tomoyuki Endo                   | Tohoku Medical and Pharmaceutical University                             |
| Dr Yudai Iwasaki                | Tohoku University                                                        |
| Dr Eddy Fan<br>Kathleen Exconde | Toronto General Hospital                                                 |
| Kenny Chan King-Chung           | Tuen Mun Hospital                                                        |
| Dr Vadim Gudzenko               | UCLA Medical Centre (Ronald Regan)                                       |
| Dr Beate Hugi-Mayr              | Universitätsspital Bern, Universitätsklinik für Herz- und Gefäßchirurgie |
| Dr Fabio Taccone                | Universite Libre de Bruxelles                                            |
| Dr Fajar Perdhana               | University Airlangga Hospital (Adult)                                    |
| Yoan Lamarche                   | University de Montreal (Montreal Heart Institute)                        |
| Dr Joao Miguel Ribeiro          | University Hospital CHLN                                                 |
| Dr Nikola Bradic                | University Hospital Dubrava                                              |
| Dr Klaartje Van den Bossche     | University Hospital Leuven                                               |
| Gurmeet Singh                   | University of Alberta (Mazankowski Heart Institute)                      |
| Dr Gerdy Debeuckelaere          | University of Antwerp                                                    |
| Dr Henry T. Stelfox             | University of Calgary and Alberta Health Services                        |
| Cassia Yi                       | University of California at San Diego                                    |
| Jennifer Elia                   | University of California, Irvine                                         |
| Shu Fang                        | University of Hong Kong                                                  |
| Thomas Tribble                  | University of Kentucky Medical Center                                    |
| Shyam Shankar                   | University of Missouri                                                   |
| Dr Paolo Navalesi               | University of Padova                                                     |
| Raj Padmanabhan                 | University of Pittsburgh Medical Centre                                  |
| Bill Hallinan                   | University of Rochester Medical Centre (UR Medicine)                     |
| Luca Paoletti                   | University of South Carolina                                             |
| Yolanda Leyva                   | University of Texas Medical Branch                                       |

| Prefix/First Name/Last Name | Site Name                                                     |
|-----------------------------|---------------------------------------------------------------|
| Tatuma Fykuda               | University of the Ryukus                                      |
| Jillian Koch                | University of Wisconsin & American Family Children's Hospital |
| Amy Hackman                 | UT Southwestern                                               |
| Lisa Janowaik               | UTHealth (University of Texas)                                |
| Jennifer Osofsky            | Vassar Brothers Medical Center (VBMC)                         |
| A/Prof Katia Donadello      | Verona Integrated University Hospital                         |
| Josh Fine                   | WellSpan Health - York Hospital                               |
| Dr Benjamin Davidson        | Westmead Hospital                                             |
| Andres Oswaldo Razo Vazquez | Yale New Haven Hospital                                       |

## **References:**

1. Buuren Sv, Groothuis-Oudshoorn K. mice: Multivariate Imputation by Chained Equations in R. *J Stat Softw* 2011;45(3):67. doi: 10.18637/jss.v045.i03 [published Online First: 2011-12-12]
2. McGrath S, Lin V, Zhang Z, et al. gfoRmula: An R Package for Estimating the Effects of Sustained Treatment Strategies via the Parametric g-formula. *Patterns (N Y)* 2020;1(3):100008. doi: 10.1016/j.patter.2020.100008 [published Online First: 2020/07/14]
3. Richardson S, Hirsch JS, Narasimhan M, et al. Presenting Characteristics, Comorbidities, and Outcomes Among 5700 Patients Hospitalized With COVID-19 in the New York City Area. *JAMA* 2020;323(20):2052-59. doi: 10.1001/jama.2020.6775 [published Online First: 2020/04/23]
4. Wu C, Chen X, Cai Y, et al. Risk Factors Associated With Acute Respiratory Distress Syndrome and Death in Patients With Coronavirus Disease 2019 Pneumonia in Wuhan, China. *JAMA Intern Med* 2020;180(7):934-43. doi: 10.1001/jamainternmed.2020.0994 [published Online First: 2020/03/14]
5. Schmidt M, Bailey M, Sheldrake J, et al. Predicting survival after extracorporeal membrane oxygenation for severe acute respiratory failure. The Respiratory Extracorporeal Membrane Oxygenation Survival Prediction (RESP) score. *Am J Respir Crit Care Med* 2014;189(11):1374-82. doi: 10.1164/rccm.201311-2023OC [published Online First: 2014/04/04]
6. Deatrick KB, Mazzeffi MA, Galvagno SM, Jr., et al. Outcomes of Venovenous Extracorporeal Membrane Oxygenation When Stratified by Age: How Old Is Too Old? *ASAIO J* 2020;66(8):946-51. doi: 10.1097/MAT.0000000000001076 [published Online First: 2020/08/03]
7. Combes A, Hajage D, Capellier G, et al. Extracorporeal Membrane Oxygenation for Severe Acute Respiratory Distress Syndrome. *N Engl J Med* 2018;378(21):1965-75. doi: 10.1056/NEJMoa1800385 [published Online First: 2018/05/24]
8. Hernan MA, Robins JM. Using Big Data to Emulate a Target Trial When a Randomized Trial Is Not Available. *Am J Epidemiol* 2016;183(8):758-64. doi: 10.1093/aje/kwv254 [published Online First: 2016/03/20]
9. Cotton CA, Heagerty PJ. Evaluating epoetin dosing strategies using observational longitudinal data. *Ann Appl Stat* 2014;8(4):2356-77. doi: 10.1214/14-aos774
10. Hernan MA. How to estimate the effect of treatment duration on survival outcomes using observational data. *BMJ* 2018;360:k182. doi: 10.1136/bmj.k182 [published Online First: 2018/02/09]
11. Hernán MA, Brumback B, Robins JM. Marginal Structural Models to Estimate the Joint Causal Effect of Nonrandomized Treatments. *J Am Stat Assoc* 2001;96(454):440-48. doi: 10.1198/016214501753168154
